# Supplementary material for: Linking Taxonomic, Phylogenetic and Functional Plant Diversity with Ecosystem Services of Cliffs and Screes in Greece
Source: Plants (Basel). 2021 May 17;10(5):992. doi: 10.3390/plants10050992 (PMC8156371; doi:10.3390/plants10050992)
Supplement: Supplementary file 1 [file plants-10-00992-s001.zip]

Archive with 7 entries (7 files):
- Supplementary file Table S1.pdf
- Supplementary file Table S2.pdf
- Supplementary file_Figure S1.pdf
- Supplementary file_Figure S2.pdf
- Supplementary file_Figure S3.pdf
- Supplementary file_Figure S4.pdf
- Supplementary file_Figure S5.pdf
