# Supplementary material for: Linking Taxonomic, Phylogenetic and Functional Plant Diversity with Ecosystem Services of Cliffs and Screes in Greece
Source: Plants (Basel). 2021 May 17;10(5):992. doi: 10.3390/plants10050992 (PMC8156371; doi:10.3390/plants10050992)
Supplement: Supplementary file 1 [file plants-10-00992-s001.zip › Supplementary file Table S1.pdf]

**Table S1.** Plant taxa occurring on cliffs and screes and their geographical distribution on the 13 floristic regions of Greece according Dimopoulos et al (2013, 2016) and <http://portal.cybertaxonomy.org/flora-greece/> (Dimopoulos et al 2020).

[illegible]

|                                                                          |   |   |   |   |   |   |   |   |   |   |   |   |   |  |    |   |
|--------------------------------------------------------------------------|---|---|---|---|---|---|---|---|---|---|---|---|---|--|----|---|
| <i>Alchemilla aroanica</i> (Buser) Rothm.                                |   |   |   |   | x |   |   |   |   |   |   |   |   |  | *  | H |
| <i>Alchemilla velebitica</i> (Janch.) Degen                              |   | x | x |   |   |   |   |   |   |   |   |   |   |  | Bk | H |
| <i>Allium aegilicum</i> Tzanoud.                                         |   |   |   |   | x |   |   |   |   |   |   |   |   |  | *  | G |
| <i>Allium bourgeau</i> Rech. f.                                          |   |   |   |   | x | x |   |   |   | x | x | x |   |  | EM | G |
| <i>Allium bourgeau</i> Rech. f. subsp. <i>bourgeau</i>                   |   |   |   |   |   |   |   |   |   |   |   | x | x |  | EM | G |
| <i>Allium bourgeau</i> subsp. <i>creticum</i> Bothmer                    |   |   |   |   |   |   |   |   |   |   |   | x |   |  | *  | G |
| <i>Allium bourgeau</i> subsp. <i>cycladicum</i> Bothmer                  |   |   |   |   | x | x |   |   |   | x |   |   | x |  | EM | G |
| <i>Allium brulloi</i> Salmeri                                            |   |   |   |   |   |   |   |   |   | x |   |   |   |  | *  | G |
| <i>Allium calamarophilon</i> Phitos & Tzanoud.                           |   |   |   |   |   |   |   |   |   | x |   |   |   |  | *  | G |
| <i>Allium callimischon</i> Link                                          | x | x | x | x | x |   |   |   |   |   |   | x |   |  | EM | G |
| <i>Allium callimischon</i> subsp. <i>haemostictum</i> Stearn             |   |   |   |   |   |   |   |   |   |   |   | x |   |  | EM | G |
| <i>Allium dilatatum</i> Zahar.                                           |   |   |   |   |   |   |   |   |   |   |   | x |   |  | *  | G |
| <i>Allium frigidum</i> Boiss. & Heldr.                                   |   |   |   | x | x |   |   |   |   |   |   |   |   |  | *  | G |
| <i>Allium heldreichii</i> Boiss.                                         |   |   |   | x |   | x | x | x |   |   |   |   |   |  | *  | G |
| <i>Allium platakisii</i> Tzanoud. & Kypriot.                             |   |   |   |   |   |   |   |   |   |   |   | x |   |  | *  | G |
| <i>Allium sandrasicum</i> Kollmann & al.                                 |   |   |   |   |   |   |   |   |   |   |   |   | x |  | EM | G |
| <i>Allium subhirsutum</i> L.                                             | x |   | x | x | x | x | x | x | x | x | x | x | x |  | Me | G |
| <i>Allosorus acrosticus</i> (Balb.) Christenh.                           | x | x | x | x | x | x | x | x | x | x | x | x | x |  | Me | G |
| <i>Allosorus guanchicus</i> (Bolle) Christenh.                           |   |   |   | x |   |   |   |   |   |   |   |   | x |  | Me | G |
| <i>Allosorus persicus</i> (Bory) Christenh.                              |   | x | x | x | x |   | x | x | x | x |   | x | x |  | Me | G |
| <i>Allosorus pteridioides</i> (Reichard) Christenh.                      | x |   |   | x | x |   |   | x |   |   | x | x | x |  | MS | G |
| <i>Alopecurus gerardii</i> Vill.                                         |   | x | x | x | x |   | x | x |   | x |   |   |   |  | Me | G |
| <i>Alyssoides cretica</i> (L.) Medik.                                    |   |   |   |   |   |   |   |   |   |   | x | x |   |  | *  | C |
| <i>Alyssum montanum</i> L.                                               | x | x | x | x | x | x | x | x | x | x |   |   |   |  | EA | C |
| <i>Alyssum samium</i> T.R. Dudley & Christod.                            |   |   |   |   |   |   |   |   |   |   |   |   | x |  | *  | H |
| <i>Amelanchier ovalis</i> Medik.                                         | x | x | x | x | x | x | x | x | x | x |   | x |   |  | EA | P |
| <i>Amelanchier ovalis</i> Medik. subsp. <i>ovalis</i>                    | x | x |   |   | x | x | x | x |   | x |   |   |   |  | ME | P |
| <i>Amelanchier ovalis</i> subsp. <i>cretica</i> (Willd.) Maire & Petitm. |   | x | x | x | x |   | x |   |   | x |   | x |   |  | Me | P |
| <i>Amelanchier parviflora</i> Boiss.                                     |   |   |   | x | x |   |   |   |   | x |   |   | x |  | EM | P |
| <i>Amelanchier parviflora</i> subsp. <i>chelmea</i> (Halácsy) Ziel.      |   |   |   | x | x |   |   |   |   | x |   |   |   |  | *  | P |
| <i>Amelanchier parviflora</i> subsp. <i>dentata</i> (Boiss.) K.I. Chr.   |   |   |   |   |   |   |   |   |   |   |   |   | x |  | EM | P |
| <i>Anogramma leptophylla</i> (L.) Link                                   | x | x | x | x | x | x | x | x | x | x | x | x | x |  | Co | T |
| <i>Anthemis ammanthus</i> Greuter                                        |   |   |   |   |   |   |   |   |   |   | x | x |   |  | *  | T |
| <i>Anthemis ammanthus</i> Greuter subsp. <i>ammanthus</i>                |   |   |   |   |   |   |   |   |   |   | x | x |   |  | *  | T |

[illegible]

|                                                                                |   |   |   |   |   |   |   |   |   |   |   |   |   |   |    |   |
|--------------------------------------------------------------------------------|---|---|---|---|---|---|---|---|---|---|---|---|---|---|----|---|
| <i>Asperula boissieri</i> Boiss.                                               |   |   |   | x | x |   |   |   |   |   |   |   |   |   | *  | C |
| <i>Asperula boryana</i> (Walp.) Ehrend.                                        |   |   |   | x |   |   |   |   |   |   |   |   |   |   | *  | C |
| <i>Asperula chlorantha</i> Boiss. & Heldr.                                     | x | x | x | x | x |   |   |   |   |   |   |   |   |   | Bk | C |
| <i>Asperula crassula</i> Greuter & Zaffran                                     |   |   |   |   |   |   |   |   |   |   |   | x |   |   | *  | C |
| <i>Asperula doerfleri</i> Wettst.                                              |   | x |   |   |   |   |   | x |   |   |   |   |   |   | Bk | C |
| <i>Asperula elonea</i> Iatrou & Georgiadis                                     |   |   |   |   | x |   |   |   |   |   |   |   |   |   | *  | C |
| <i>Asperula lutea</i> Sm.                                                      |   |   | x | x | x |   |   |   |   | x |   |   |   |   | *  | H |
| <i>Asperula lutea</i> Sm. subsp. <i>lutea</i>                                  |   |   | x | x | x |   |   |   |   |   |   |   |   |   | *  | C |
| <i>Asperula lutea</i> subsp. <i>euboea</i> Ehrend.                             |   |   |   |   |   |   |   |   |   | x |   |   |   |   | *  | C |
| <i>Asperula lutea</i> subsp. <i>griseola</i> Greuter                           |   |   |   |   | x |   |   |   |   |   |   |   |   |   | *  | C |
| <i>Asperula lutea</i> subsp. <i>mungieri</i> (Boiss. & Heldr.) Maire & Petitm. |   |   |   |   | x |   |   |   |   |   |   |   |   |   | *  | C |
| <i>Asperula muscosa</i> Boiss. & Heldr.                                        |   |   |   |   |   |   |   | x |   |   |   |   |   |   | *  | H |
| <i>Asperula naufraga</i> Ehrend. & Gutermann                                   | x |   |   |   |   |   |   |   |   |   |   |   |   |   | *  | C |
| <i>Asperula nitida</i> subsp. <i>mytilinica</i> Ehrend.                        |   |   |   |   |   |   |   |   |   |   |   |   | x |   | *  | C |
| <i>Asperula oetaea</i> (Boiss.) Halácsy                                        |   |   | x | x | x |   |   |   |   |   |   |   |   |   | *  | C |
| <i>Asperula ophiolitica</i> Ehrend.                                            |   |   |   |   |   |   |   |   |   | x |   |   |   |   | *  | C |
| <i>Asperula pubescens</i> (Willd.) Ehrend. & Schönb.-Tem.                      |   |   |   |   |   |   |   |   |   |   |   | x |   |   | *  | C |
| <i>Asperula pulvinaris</i> (Boiss.) Boiss.                                     |   |   |   |   | x |   |   |   |   |   |   |   |   |   | *  | C |
| <i>Asperula purpurea</i> (L.) Ehrend.                                          |   | x |   |   | x |   | x | x | x | x |   |   |   |   | ME | C |
| <i>Asperula purpurea</i> (L.) Ehrend. subsp. <i>purpurea</i>                   |   |   |   |   |   |   | x | x | x |   |   |   |   |   | ME | C |
| <i>Asperula purpurea</i> subsp. <i>apiculata</i> (Sm.) Ehrend.                 |   | x | x |   | x |   | x | x | x |   |   |   |   |   | BA | C |
| <i>Asperula samia</i> Christod. & T. Georgiadis                                |   |   |   |   |   |   |   |   |   |   |   |   | x |   | *  | C |
| <i>Asperula saxicola</i> Ehrend.                                               |   |   |   | x |   |   |   |   |   |   |   |   |   |   | *  | C |
| <i>Asperula suberosa</i> Sm.                                                   |   |   |   |   |   |   |   | x |   |   |   |   |   |   | Bk | C |
| <i>Asperula suffruticosa</i> Boiss. & Heldr.                                   |   |   |   |   |   |   |   |   |   | x |   |   |   |   | *  | C |
| <i>Asperula taygetea</i> Boiss. & Heldr.                                       |   |   |   | x |   |   |   |   |   |   |   | x |   |   | *  | C |
| <i>Asperula tournefortii</i> Spreng.                                           |   |   |   |   |   |   |   |   |   |   | x | x | x |   | EM | C |
| <i>Asplenium adiantum-nigrum</i> L.                                            | x | x | x | x | x | x | x | x | x | x | x | x | x |   | Pt | H |
| <i>Asplenium aegaeum</i> Lovis & al.                                           |   |   |   |   | ? |   |   |   |   |   |   |   | x |   | EM | H |
| <i>Asplenium bourgaei</i> Milde                                                |   |   |   |   |   |   |   |   |   |   |   |   | x | x | EM | H |
| <i>Asplenium ceterach</i> L.                                                   | x | x | x | x | x | x | x | x | x | x | x | x | x |   | EA | H |
| <i>Asplenium creticum</i> Lovis & al.                                          |   |   |   |   |   |   |   |   |   |   |   |   | x |   | *  | H |
| <i>Asplenium cuneifolium</i> Viv.                                              |   | x | x |   | x |   | x |   |   |   |   |   |   |   | Eu | H |
| <i>Asplenium fissum</i> Willd.                                                 |   | x | x | x | x |   | x | x |   |   |   |   |   |   | Eu | H |

|                                                                                      |   |   |   |   |   |   |   |   |   |   |   |   |   |   |    |   |
|--------------------------------------------------------------------------------------|---|---|---|---|---|---|---|---|---|---|---|---|---|---|----|---|
| <i>Asplenium lepidum</i> C. Presl subsp. <i>lepidum</i>                              |   |   |   | x |   |   | x |   |   |   |   |   | x |   | Eu | H |
| <i>Asplenium lepidum</i> subsp. <i>haussknechtii</i> (Godet & Reut.) Brownsey        |   |   |   |   |   |   |   |   |   |   |   |   | x |   | MS | H |
| <i>Asplenium obovatum</i> Viv.                                                       |   |   |   | x |   |   | x | x | x | x | x | x | x | x | Me | H |
| <i>Asplenium petrarchae</i> (Guérin) DC.                                             |   |   |   | x |   |   |   |   |   |   |   |   |   |   | Me | H |
| <i>Asplenium ruta-muraria</i> L.                                                     | x | x | x | x | x | x | x | x | x | x | x | x | x | x | Ct | H |
| <i>Asplenium scolopendrium</i> L.                                                    | x | x | x | x | x | x | x | x | x | x | x | x | x |   | Pt | H |
| <i>Asplenium scolopendrium</i> subsp. <i>antri-jovis</i> (Kümmerle) Brownsey & Jermy |   |   |   |   |   |   |   |   |   |   |   | x | x |   | EM | H |
| <i>Asplenium septentrionale</i> (L.) Hoffm.                                          |   |   | x | x | x | x | x | x | x |   |   |   |   |   | Bo | H |
| <i>Asplenium trichomanes</i> L. subsp. <i>trichomanes</i>                            | x | x | x | x | x | x | x | x | x | x |   |   |   |   | Co | H |
| <i>Asplenium trichomanes</i> subsp. <i>inexpectans</i> Lovis                         |   |   | x | x | x | x |   | x |   | x |   |   | x | x | Eu | H |
| <i>Asplenium trichomanes</i> subsp. <i>pachyrachis</i> (H. Christ) Lovis & Reichst.  |   |   |   |   |   |   |   | x |   |   |   |   | x |   | Eu | H |
| <i>Asplenium trichomanes</i> subsp. <i>quadrivalens</i> D.E. Mey.                    | x | x | x | x | x | x | x | x | x | x | x | x | x | x | EA | H |
| <i>Asplenium viride</i> Huds.                                                        |   |   | x | x | x | x |   | x | x |   | x |   | x |   | Bo | H |
| <i>Astragalus creticus</i> Lam.                                                      |   |   |   |   |   |   |   |   |   |   |   |   | x |   | *  | C |
| <i>Astragalus mayeri</i> Micevski                                                    |   |   |   |   |   | x | x | x |   |   |   |   |   |   | Bk | C |
| <i>Asyneuma giganteum</i> (Boiss.) Bornm.                                            |   |   |   |   |   |   |   |   |   |   |   |   | x | x | *  | H |
| <i>Asyneuma limonifolium</i> (L.) Janch.                                             | x | x | x | x | x | x | x | x | x | x |   |   |   | x | Me | H |
| <i>Athamanta densa</i> Boiss. & Orph.                                                |   |   |   |   |   | x |   | x |   |   |   |   |   |   | Bk | H |
| <i>Aubrieta deltoidea</i> (L.) DC.                                                   | x | x | x | x | x | x | x | x | x | x | x | x | x | x | Me | C |
| <i>Aubrieta erubescens</i> Griseb.                                                   |   |   |   |   |   |   |   |   | x |   |   |   |   |   | *  | H |
| <i>Aubrieta scyria</i> Halácsy                                                       |   |   |   |   |   |   |   |   |   |   | x |   |   |   | *  | H |
| <i>Aubrieta thessala</i> Boissieu                                                    |   |   |   |   |   |   |   | x |   |   |   |   |   |   | *  | H |
| <i>Aurinia moreana</i> Tzanoud. & Iatrou                                             |   |   |   |   | x |   |   |   |   |   |   |   |   |   | *  | H |
| <i>Aurinia saxatilis</i> (L.) Desv.                                                  | x | x | x | x | x | x | x | x | x | x | x | x | x | x | ME | H |
| <i>Aurinia saxatilis</i> subsp. <i>megalocarpa</i> (Hauskn.) T.R. Dudley             | x |   |   |   | x | ? |   |   |   |   |   | x | x | x | BI | H |
| <i>Aurinia saxatilis</i> subsp. <i>orientalis</i> (Ard.) T.R. Dudley                 | x | x | x | x | x | x | x | x | x | x |   |   |   | x | BA | H |
| <i>Ballota glandulosissima</i> Hub.-Mor. & Patzak                                    |   |   |   |   |   |   |   |   |   |   |   |   |   | x | EM | C |
| <i>Bellevalia sitiaca</i> Kypriot. & Tzanoud.                                        |   |   |   |   |   |   |   |   |   |   |   |   | x |   | *  | G |
| <i>Berberis cretica</i> L.                                                           |   |   |   | x | x |   | x | x | x | x |   |   | x | x | EM | P |
| <i>Bolanthus laconicus</i> (Boiss.) Barkoudah                                        |   |   |   |   | x |   |   |   |   |   |   |   |   |   | *  | C |
| <i>Bornmuellera baldaccii</i> (Degen) Heywood                                        |   |   | x |   |   |   |   |   |   |   |   |   |   |   | Bk | H |
| <i>Brassica cretica</i> Lam.                                                         | x |   |   | x | x | x | x |   | x | x | x | x | x | x | EM | C |
| <i>Brassica cretica</i> Lam. subsp. <i>cretica</i>                                   | x |   |   | x | x | x |   |   | x | x | x | x | x | x | EM | C |
| <i>Brassica cretica</i> subsp. <i>aegaea</i> (Heldr. & Halácsy) Snogerup & al.       |   |   |   |   | x |   |   |   |   |   |   |   | x |   | *  | C |



|                                                                     |   |   |   |   |   |   |   |   |   |    |    |   |
|---------------------------------------------------------------------|---|---|---|---|---|---|---|---|---|----|----|---|
| <i>Campanula goulimyi</i> Turrill                                   |   |   |   |   |   | x |   |   |   | *  | H  |   |
| <i>Campanula hagielia</i> Boiss.                                    |   |   |   |   |   |   |   |   | x | EM | H  |   |
| <i>Campanula hawkinsiana</i> Hausskn. & Heldr.                      | x |   | x |   | x |   |   |   |   | Bk | H  |   |
| <i>Campanula heterophylla</i> L.                                    |   |   |   |   |   |   |   | x |   | *  | H  |   |
| <i>Campanula hierapetrae</i> Rech. f.                               |   |   |   |   |   |   |   |   | x | *  | G  |   |
| <i>Campanula incurva</i> A. DC.                                     |   |   |   | x | x |   | x |   |   | x  | *  | H |
| <i>Campanula jacquinii</i> (Sieber) A. DC.                          |   |   |   |   |   |   |   |   | x | *  | H  |   |
| <i>Campanula laciniata</i> L.                                       |   |   |   |   |   |   |   | x | x | *  | H  |   |
| <i>Campanula lavrensis</i> (Tocl & Rohlena) Phitos                  |   |   |   |   | x | x |   |   |   | *  | H  |   |
| <i>Campanula lyrata</i> Lam.                                        |   |   |   |   |   |   |   |   |   | x  | EM | H |
| <i>Campanula lyrata</i> Lam. subsp. <i>lyrata</i>                   |   |   |   |   |   |   |   |   |   | x  | EM | H |
| <i>Campanula lyrata</i> subsp. <i>icarica</i> Phitos                |   |   |   |   |   |   |   |   |   | x  | *  | H |
| <i>Campanula merxmuelleri</i> Phitos                                |   |   |   |   |   |   | x |   |   | x  | *  | H |
| <i>Campanula nisyria</i> Papatsou & Phitos                          |   |   |   |   |   |   |   |   |   | x  | *  | H |
| <i>Campanula oreadum</i> Boiss. & Heldr.                            |   |   |   |   | x |   |   |   |   |    | *  | H |
| <i>Campanula orphanidea</i> Boiss.                                  |   |   |   |   |   | x |   |   |   |    | Bk | H |
| <i>Campanula papillosa</i> Halácsy                                  |   | x |   |   |   |   |   |   |   |    | *  | H |
| <i>Campanula pelia</i> Bedd.                                        |   |   |   | x | x |   |   |   |   |    | *  | H |
| <i>Campanula pelviformis</i> Lam.                                   |   |   |   |   |   |   |   |   |   | x  | *  | H |
| <i>Campanula pinatzii</i> Greuter & Phitos                          |   |   |   |   |   |   |   |   |   | x  | *  | T |
| <i>Campanula rechingeri</i> Phitos                                  |   |   |   |   |   |   | x |   |   |    | *  | H |
| <i>Campanula reiseri</i> Halácsy                                    |   |   |   |   |   |   | x | x |   |    | *  | H |
| <i>Campanula rhodensis</i> A. DC.                                   |   |   |   |   |   |   |   |   |   | x  | *  | T |
| <i>Campanula rumeliana</i> (Hampe) Vatke                            |   |   |   |   | x | x | x | x |   |    | BA | H |
| <i>Campanula rupestris</i> Sm.                                      |   |   | x |   |   |   |   |   |   |    | *  | H |
| <i>Campanula rupicola</i> Boiss. & Spruner                          |   |   | x |   |   |   |   |   |   |    | *  | H |
| <i>Campanula samothracica</i> (Degen) Greuter & Burdet              |   |   |   |   |   |   | x | x |   |    | *  | H |
| <i>Campanula saonissia</i> Biel & Kit Tan                           |   |   |   |   |   |   | x |   |   |    | *  | T |
| <i>Campanula sartorii</i> Boiss. & Heldr.                           |   |   |   |   |   |   |   |   | x |    | *  | H |
| <i>Campanula saxatilis</i> L.                                       |   | x |   |   |   |   |   |   |   | x  | *  | H |
| <i>Campanula saxatilis</i> L. subsp. <i>saxatilis</i>               |   |   |   |   |   |   |   |   |   | x  | *  | H |
| <i>Campanula saxatilis</i> subsp. <i>cytherea</i> Rech. f. & Phitos |   | x |   |   |   |   |   |   |   |    | *  | H |
| <i>Campanula sciathia</i> Phitos                                    |   |   |   |   |   |   | x |   |   |    | *  | H |
| <i>Campanula scopelia</i> Phitos                                    |   |   |   |   |   |   | x |   |   |    | *  | H |

[illegible]

[illegible]

|                                                                              |   |   |   |   |   |   |   |   |   |   |   |   |   |    |    |
|------------------------------------------------------------------------------|---|---|---|---|---|---|---|---|---|---|---|---|---|----|----|
| <i>Cleome iberica</i> DC.                                                    |   |   |   |   |   |   |   |   |   |   |   |   | x | EA | T  |
| <i>Clinopodium taygeteum</i> (P.H. Davis) Bräuchler & Heubl                  |   |   |   | x |   |   |   |   |   |   |   |   |   | *  | H  |
| <i>Convolvulus argyrothamnos</i> Greuter                                     |   |   |   |   |   |   |   |   |   |   |   | x |   | *  | C  |
| <i>Convolvulus oleifolius</i> Desr.                                          | ? |   | ? | x | x | x |   |   | x | x | x | x | x | Me | C  |
| <i>Cosentinia vellea</i> (Aiton) Tod.                                        | x |   |   | x | x |   |   | x |   | x | x | x | x | MS | G  |
| <i>Cotoneaster creticus</i> J. Fryer & B. Hylmö                              |   |   |   |   |   |   |   |   |   |   |   | x |   | *  | P  |
| <i>Cotoneaster integerrimus</i> Medik.                                       | x | x | x | x | x | x | x | x |   |   |   |   |   | EA | P  |
| <i>Cotoneaster nummularius</i> Fisch. & C.A. Mey.                            |   |   |   |   |   |   |   |   |   |   |   |   | x | MS | P  |
| <i>Cotoneaster tomentosus</i> (Aiton) Lindl.                                 |   |   | x | x | x | x | x | x | x | x |   |   |   | ME | P  |
| <i>Crepis auriculifolia</i> Spreng.                                          |   |   |   |   |   |   |   |   |   |   |   | x |   | *  | H  |
| <i>Crepis heldreichiana</i> (Kuntze) Greuter                                 |   |   |   | x |   |   |   |   |   |   |   |   |   | *  | H  |
| <i>Crepis neglecta</i> subsp. <i>graeca</i> (Vierh.) Rech. f.                |   |   |   | x | x | x | x |   | x | x | x |   |   | *  | T  |
| <i>Cyclamen graecum</i> Link                                                 | x | x | x | x | x | x | x | x |   | x | x | x | x | EM | G  |
| <i>Cymbalaria acutiloba</i> subsp. <i>paradoxa</i> (Greuter) Carcinero & al. |   |   |   |   |   |   |   |   |   |   |   |   | x | *  | HC |
| <i>Cymbalaria longipes</i> (Boiss. & Heldr.) A. Cheval.                      |   |   |   | x | x |   |   |   |   | x | x | x | x | EM | HC |
| <i>Cymbalaria microcalyx</i> (Boiss.) Wettst.                                | x |   | x | x | x |   |   |   |   |   | x | x | x | Bk | HC |
| <i>Cymbalaria microcalyx</i> (Boiss.) Wettst. subsp. <i>microcalyx</i>       |   |   |   | x |   |   |   |   |   |   |   |   |   | *  | HC |
| <i>Cymbalaria microcalyx</i> subsp. <i>heterosepala</i> (Cufod.) Speta       |   |   |   | x |   |   |   |   |   |   |   | x |   | *  | HC |
| <i>Cymbalaria minor</i> (Cufod.) Speta subsp. <i>minor</i>                   | x |   | x | x | x |   |   |   |   |   |   |   |   | BA | HC |
| <i>Cymbalaria minor</i> subsp. <i>dodekanesi</i> (Greuter) Carcinero & al.   |   |   |   |   |   |   |   |   |   |   | x | x | x | *  | HC |
| <i>Cystopteris alpina</i> (Lam.) Desv.                                       |   |   | x |   | x |   | x |   | x |   |   |   |   | EA | G  |
| <i>Cystopteris fragilis</i> (L.) Bernh.                                      | x | x | x | x | x | x | x | x | x | x | x | x | x | Co | G  |
| <i>Danthoniastrum compactum</i> (Boiss. & Heldr.) Holub                      |   |   | x | x | x | x |   | x |   |   |   |   |   | Bk | H  |
| <i>Daphne jasminea</i> Sm.                                                   |   |   |   | x | x |   |   |   |   | x |   | x |   | Me | C  |
| <i>Daphne oleoides</i> Schreb.                                               | x | x | x | x | x | x | x | x |   | x |   | x |   | Me | C  |
| <i>Dianthus cinnamomeus</i> Sm.                                              |   |   |   |   |   |   |   |   |   |   | x | x |   | *  | H  |
| <i>Dianthus cinnamomeus</i> Sm. subsp. <i>cinnamomeus</i>                    |   |   |   |   |   |   |   |   |   |   | x | x |   | *  | H  |
| <i>Dianthus cinnamomeus</i> subsp. <i>naxensis</i> Runemark                  |   |   |   |   |   |   |   |   |   |   | x |   |   | *  | H  |
| <i>Dianthus desideratus</i> Strid                                            |   |   |   |   |   |   |   |   |   | x |   |   |   | *  | C  |
| <i>Dianthus elegans</i> d'Urv.                                               |   |   |   |   |   |   |   |   |   |   |   |   | x | EM | H  |
| <i>Dianthus fruticosus</i> L.                                                | x |   |   | x |   |   |   |   |   |   | x | x | x | *  | C  |
| <i>Dianthus fruticosus</i> L. subsp. <i>fruticosus</i>                       |   |   |   |   |   |   |   |   |   |   | x |   |   | *  | C  |
| <i>Dianthus fruticosus</i> subsp. <i>amorginus</i> Runemark                  |   |   |   |   |   |   |   |   |   |   | x | x |   | *  | C  |
| <i>Dianthus fruticosus</i> subsp. <i>carpathus</i> Runemark                  |   |   |   |   |   |   |   |   |   |   |   | x |   | *  | C  |

|                                                                              |   |   |   |   |   |   |   |   |   |   |   |   |   |   |   |   |    |    |   |
|------------------------------------------------------------------------------|---|---|---|---|---|---|---|---|---|---|---|---|---|---|---|---|----|----|---|
| <i>Dianthus fruticosus</i> subsp. <i>creticus</i> (Tausch) Runemark          |   |   |   |   |   |   |   |   |   |   |   |   |   | x | * | C |    |    |   |
| <i>Dianthus fruticosus</i> subsp. <i>karavius</i> Runemark                   |   |   |   |   |   |   |   |   |   |   |   |   |   |   | x | * | C  |    |   |
| <i>Dianthus fruticosus</i> subsp. <i>occidentalis</i> Runemark               | x |   |   |   |   | x |   |   |   |   |   |   |   | x |   | * | C  |    |   |
| <i>Dianthus fruticosus</i> subsp. <i>rhodius</i> (Rech. f.) Runemark         |   |   |   |   |   |   |   |   |   |   |   |   |   |   | x | * | C  |    |   |
| <i>Dianthus fruticosus</i> subsp. <i>sitiacus</i> Runemark                   |   |   |   |   |   |   |   |   |   |   |   |   |   | x |   | * | C  |    |   |
| <i>Dianthus juniperinus</i> Sm.                                              |   |   |   |   |   |   |   |   |   |   |   |   |   | x |   | * | C  |    |   |
| <i>Dianthus juniperinus</i> Sm. subsp. <i>juniperinus</i>                    |   |   |   |   |   |   |   |   |   |   |   |   |   | x |   | * | C  |    |   |
| <i>Dianthus juniperinus</i> subsp. <i>aciphyllus</i> (Ser.) Turland          |   |   |   |   |   |   |   |   |   |   |   |   |   | x |   | * | C  |    |   |
| <i>Dianthus juniperinus</i> subsp. <i>bauhinorum</i> (Greuter) Turland       |   |   |   |   |   |   |   |   |   |   |   |   |   | x |   | * | C  |    |   |
| <i>Dianthus juniperinus</i> subsp. <i>heldreichii</i> Greuter                |   |   |   |   |   |   |   |   |   |   |   |   |   | x |   | * | C  |    |   |
| <i>Dianthus juniperinus</i> subsp. <i>idaeus</i> Turland                     |   |   |   |   |   |   |   |   |   |   |   |   |   | x |   | * | C  |    |   |
| <i>Dianthus juniperinus</i> subsp. <i>kavusicus</i> Turland                  |   |   |   |   |   |   |   |   |   |   |   |   |   | x |   | * | C  |    |   |
| <i>Dianthus juniperinus</i> subsp. <i>pulviniformis</i> (Greuter) Turland    |   |   |   |   |   |   |   |   |   |   |   |   |   | x |   | * | C  |    |   |
| <i>Dianthus pinifolius</i> Sm.                                               |   |   | x | x | x | x | x | x | x | x |   |   |   |   |   |   | BA | H  |   |
| <i>Dianthus pinifolius</i> subsp. <i>tenuicaulis</i> (Turrill) Strid         |   |   |   |   |   |   |   |   |   | x |   |   |   |   |   |   | *  | H  |   |
| <i>Dianthus stamatiadae</i> Rech. f.                                         |   |   |   |   |   |   |   | x |   |   |   |   |   |   |   |   | *  | C  |   |
| <i>Dianthus sylvestris</i> subsp. <i>longicaulis</i> (Ten.) Greuter & Burdet | x |   |   |   |   |   |   |   |   |   |   |   |   |   |   |   | Me | H  |   |
| <i>Dianthus sylvestris</i> Wulfen                                            | x | x | x |   |   |   |   | x |   |   |   |   |   |   |   |   |    | ME | H |
| <i>Dianthus xylorrhizus</i> Boiss. & Heldr.                                  |   |   |   |   |   |   |   |   |   |   |   |   |   | x |   |   | *  | C  |   |
| <i>Dianthus zonatus</i> Fenzl                                                |   |   |   |   |   |   |   |   |   |   |   |   |   |   |   | x |    | EM | C |
| <i>Doronicum columnae</i> Ten.                                               |   |   | x |   |   |   | x | x | x | x |   |   |   | x |   |   |    | BC | H |
| <i>Draba lacaitae</i> Boiss.                                                 |   |   |   |   |   | x | x |   |   |   |   |   |   |   |   |   |    | Bk | H |
| <i>Draba lasiocarpa</i> Rochel                                               | x | x | x | x | x | x | x | x | x | x |   |   |   |   |   |   |    | BC | H |
| <i>Draba parnassica</i> Boiss. & Heldr.                                      |   |   |   |   |   |   | x |   |   |   |   |   |   | x |   |   |    | *  | H |
| <i>Drymocallis halacsyana</i> (Degen) Kurtto & Strid                         |   |   |   |   |   |   |   |   |   |   | x |   |   |   |   |   |    | *  | H |
| <i>Dryopteris mindshelkensis</i> Pavlov                                      |   |   | x | x | x | x |   |   |   |   |   |   |   |   |   |   |    | Me | G |
| <i>Dryopteris pallida</i> (Bory) Maire & Petitm.                             | x | x | x | x | x | x | x | x | x | x | x | x | x | x | x | x |    | Me | G |
| <i>Dryopteris villarii</i> (Bellardi) Schinz & Thell.                        |   |   | x |   | x | x |   |   | x | x |   |   |   |   |   |   |    | ME | G |
| <i>Drypis spinosa</i> L.                                                     |   |   | x | x | x | x |   |   | x |   |   |   |   | x |   |   |    | Bl | H |
| <i>Ebenus cretica</i> L.                                                     |   |   |   |   |   |   |   |   |   |   |   |   |   |   | x |   |    | *  | C |
| <i>Edraianthus graminifolius</i> (L.) A. DC.                                 |   |   | x | x | x | x |   |   | x | x |   |   |   |   |   |   |    | Bl | C |
| <i>Ephedra foeminea</i> Forssk.                                              | x | x | x | x | x | x | x | x | x | x | x | x | x | x | x | x |    | Me | P |
| <i>Epilobium collinum</i> C.C. Gmel.                                         |   |   | x | x | x | x |   |   | x | x | x | x |   |   |   |   |    | Me | H |
| <i>Eryngium amethystinum</i> L.                                              | x | x | x | x | x | x | x | x | x |   |   | x |   |   |   |   |    | Me | H |

|                                                                 |   |   |   |   |   |   |   |   |   |   |   |   |   |    |     |
|-----------------------------------------------------------------|---|---|---|---|---|---|---|---|---|---|---|---|---|----|-----|
| <i>Eryngium amorginum</i> Rech. f.                              |   |   |   |   |   |   |   |   |   |   | x | x |   | *  | H   |
| <i>Eryngium glomeratum</i> Lam.                                 |   |   |   |   |   |   |   |   |   |   | x | x | x | EM | H   |
| <i>Eryngium ternatum</i> Poir.                                  |   |   |   |   |   |   |   |   |   |   |   | x |   | *  | H   |
| <i>Erysimum candicum</i> Snogerup subsp. <i>candicum</i>        |   |   |   |   |   |   |   |   |   |   | x | x |   | *  | C   |
| <i>Erysimum candicum</i> subsp. <i>carpathum</i> Snogerup       |   |   |   |   |   |   |   |   |   |   |   | x |   | *  | C   |
| <i>Erysimum corinthium</i> (Boiss.) Wettst.                     | x |   |   |   | x | x |   |   |   |   |   |   |   | *  | C   |
| <i>Erysimum microstylum</i> Hausskn.                            | x | x |   |   |   | x | x | x |   | x |   |   |   | BA | H   |
| <i>Erysimum naxense</i> Snogerup                                |   |   |   |   |   |   |   |   |   |   | x |   |   | *  | H   |
| <i>Erysimum rhodium</i> Snogerup                                |   |   |   |   |   |   |   |   |   |   |   |   | x | *  | C   |
| <i>Erysimum senoneri</i> (Reut.) Wettst. subsp. <i>senoneri</i> |   |   |   |   |   |   |   |   |   | x | x |   |   | *  | C   |
| <i>Erysimum senoneri</i> subsp. <i>icaricum</i> Snogerup        |   |   |   |   |   |   |   |   |   |   |   |   | x | *  | C   |
| <i>Euphorbia bivonae</i> Steud.                                 |   |   |   |   | x |   |   |   |   |   |   |   | x | Me | P   |
| <i>Euphorbia characias</i> L.                                   | x | x | x | x | x | x | x | x | x | x | x | x | x | Me | H   |
| <i>Euphorbia deflexa</i> Sm.                                    |   | x | x | x | x | x | x | x | x | x |   | x |   | Bk | H   |
| <i>Euphorbia dendroides</i> L.                                  | x |   | x | x | x | x |   | x |   | x | x | x | x | Me | P   |
| <i>Euphorbia herniariifolia</i> Willd.                          |   | x | x | x | x | x | x |   |   | x |   | x | x | EM | H   |
| <i>Euphorbia kotschyana</i> Fenzl                               |   |   |   |   |   |   |   |   |   |   |   |   | x | EM | H C |
| <i>Euphorbia petrophila</i> C.A. Mey.                           |   |   |   |   |   |   |   |   |   |   |   |   | x | IT | T   |
| <i>Euphorbia sultan-hassei</i> Strid & al.                      |   |   |   |   |   |   |   |   |   |   |   | x |   | *  | P   |
| <i>Ferula communis</i> L.                                       | x | x | x | x | x | x | x | x | x | x | x | x | x | Me | H   |
| <i>Ferula communis</i> subsp. <i>glauca</i> (L.) Rouy & Camus   | x |   | x | x | x |   |   |   |   | x | x | x | x | Me | H   |
| <i>Ferula tingitana</i> L.                                      |   |   |   |   |   |   |   |   |   |   |   |   | x | Me | H   |
| <i>Ferulago thyrsiflora</i> (Sm.) W.D.J. Koch                   |   |   |   |   |   |   |   |   |   |   |   | x |   | *  | H   |
| <i>Festuca olympica</i> J. Vetter                               |   |   |   |   |   |   | x |   |   |   |   |   |   | *  | H   |
| <i>Festuca polita</i> (Halácsy) Tzvelev                         |   | x | x | x | x |   |   | x |   | x |   | x |   | EM | H   |
| <i>Festuca pseudosupina</i> J. Vetter                           |   | x | x | x | x |   |   | x |   | x |   | x |   | EM | H   |
| <i>Festuca sipylea</i> (Hack.) Markgr.-Dann.                    |   |   |   |   |   |   |   |   |   |   |   |   | x | *  | H   |
| <i>Festuca spectabilis</i> Bertol.                              |   | x | x | x | x | x |   |   |   |   |   |   |   | Eu | H   |
| <i>Festuca stygia</i> H. Scholz & Strid                         |   |   |   |   |   |   |   |   |   |   |   | x |   | EM | H   |
| <i>Festuca stygia</i> H. Scholz & Strid                         |   |   |   |   | x |   |   |   |   |   |   |   |   | *  | H   |
| <i>Fibigia clypeata</i> (L.) Medik.                             |   | x | x | x | x |   | x |   |   | x |   |   |   | MS | H   |
| <i>Ficus carica</i> L.                                          | x | x | x | x | x | x | x | x | x | x | x | x | x | MS | P   |
| <i>Gagea graeca</i> (L.) Irmisch                                | x |   | x | x | x | x |   |   |   | x | x | x | x | BA | G   |
| <i>Galatella cretica</i> Gand.                                  |   |   |   |   |   |   |   |   |   |   |   | x | x | EM | H   |

|                                 |  |  |  |  |  |  |  |  |   |   |  |  |  |  |  |  |  |  |  |  |  |  |  |  |  |  |  |  |  |  |  |  |  |  |  |  |  |  |  |  |  |  |  |  |  |  |  |  |  |  |  |  |  |  |  |  |  |  |  |  |  |  |  |  |  |  |  |  |  |  |  |  |  |  |  |  |  |  |  |  |  |  |  |  |  |  |  |  |  |  |  |  |  |  |  |  |  |  |  |  |  |  |  |  |  |  |  |  |  |  |  |  |  |  |  |  |  |  |  |  |  |  |  |  |  |  |  |  |  |  |  |  |  |  |  |  |  |  |  |  |  |  |  |  |  |  |  |  |  |  |  |  |  |  |  |  |  |  |  |  |  |  |  |  |  |  |  |  |  |  |  |  |  |  |  |  |  |  |  |  |  |  |  |  |  |  |  |  |  |  |  |  |  |  |  |  |  |  |  |  |  |  |  |  |  |  |  |  |  |  |  |  |  |  |  |  |  |  |  |  |  |  |  |  |  |  |  |  |  |  |  |  |  |  |  |  |  |  |  |  |  |  |  |  |  |  |  |  |  |  |  |  |  |  |  |  |  |  |  |  |  |  |  |  |  |  |  |  |  |  |  |  |  |  |  |  |  |  |  |  |  |  |  |  |  |  |  |  |  |  |  |  |  |  |  |  |  |  |  |  |  |  |  |  |  |  |  |  |  |  |  |  |  |  |  |  |  |  |  |  |  |  |  |  |  |  |  |  |  |  |  |  |  |  |  |  |  |  |  |  |  |  |  |  |  |  |  |  |  |  |  |  |  |  |  |  |  |  |  |  |  |  |  |  |  |  |  |  |  |  |  |  |  |  |  |  |  |  |  |  |  |  |  |  |  |  |  |  |  |  |  |  |  |  |  |  |  |  |  |  |  |  |  |  |  |  |  |  |  |  |  |  |  |  |  |  |  |  |  |  |  |  |  |  |  |  |  |  |  |  |  |  |  |  |  |  |  |  |  |  |  |  |  |  |  |  |  |  |  |  |  |  |  |  |  |  |  |  |  |  |  |  |  |  |  |  |  |  |  |  |  |  |  |  |  |  |  |  |  |  |  |  |  |  |  |  |  |  |  |  |  |  |  |  |  |  |  |  |  |  |  |  |  |  |  |  |  |  |  |  |  |  |  |  |  |  |  |  |  |  |  |  |  |  |  |  |  |  |  |  |  |  |  |  |  |  |  |  |  |  |  |  |  |  |  |  |  |  |  |  |  |  |  |  |  |  |  |  |  |  |  |  |  |  |  |  |  |  |  |  |  |  |  |  |  |  |  |  |  |  |  |  |  |  |  |  |  |  |  |  |  |  |  |  |  |  |  |  |  |  |  |  |  |  |  |  |  |  |  |  |  |  |  |  |  |  |  |  |  |  |  |  |  |  |  |  |  |  |  |  |  |  |  |  |  |  |  |  |  |  |  |  |  |  |  |  |  |  |  |  |  |  |  |  |  |  |  |  |  |  |  |  |  |  |  |  |  |  |  |  |  |  |  |  |  |  |  |  |  |  |  |  |  |  |  |  |  |  |  |  |  |  |  |  |  |  |  |  |  |  |  |  |  |  |  |  |  |  |  |  |  |  |  |  |  |  |  |  |  |  |  |  |  |  |  |  |  |  |  |  |  |  |  |  |  |  |  |  |  |  |  |  |  |  |  |  |  |  |  |  |  |  |  |  |  |  |  |  |  |  |  |  |  |  |  |  |  |  |  |  |  |  |  |  |  |  |  |  |  |  |  |  |  |  |  |  |  |  |  |  |  |  |  |  |  |  |  |  |  |  |  |  |  |  |  |  |  |  |  |  |  |  |  |  |  |  |  |  |  |  |  |  |  |  |  |  |  |  |  |  |  |  |  |  |  |  |  |  |  |  |  |  |  |  |  |  |  |  |  |  |  |  |  |  |  |  |  |  |  |  |  |  |  |  |  |  |  |  |  |  |  |  |  |  |  |  |  |  |  |  |  |  |  |  |  |  |  |  |  |  |  |  |  |  |  |  |  |  |  |  |  |  |  |  |  |  |  |  |  |  |  |  |  |  |  |  |  |  |  |  |  |  |  |  |  |  |  |  |  |  |  |  |  |  |  |  |  |  |  |  |  |  |  |  |  |  |  |  |  |  |  |  |  |  |  |  |  |  |  |  |  |  |  |  |  |  |  |  |  |  |  |  |  |  |  |  |  |  |  |  |  |  |  |  |  |  |  |  |  |  |  |  |  |  |  |  |  |  |  |  |  |  |  |  |  |  |  |  |  |  |  |  |  |  |  |  |  |  |  |  |  |  |  |  |  |  |  |  |  |  |  |  |  |  |  |  |  |  |  |  |  |  |  |  |  |  |  |  |  |  |  |  |  |  |  |  |  |  |  |  |  |  |  |  |  |  |  |  |  |  |  |  |  |  |  |  |  |  |  |  |  |  |  |  |  |  |  |  |  |  |  |  |  |  |  |  |  |  |  |  |  |  |  |  |  |  |  |  |  |  |  |  |  |  |  |  |  |  |  |  |  |  |  |  |  |  |  |  |  |  |  |  |  |  |  |  |  |  |  |  |  |  |  |  |  |  |  |  |  |  |  |  |  |  |  |  |  |  |  |  |  |  |  |  |  |  |  |  |  |  |  |  |  |  |  |  |  |  |  |  |  |  |  |  |  |  |  |  |  |  |  |  |  |  |  |  |  |  |  |  |  |  |  |  |  |  |  |  |  |  |  |  |  |  |  |  |  |  |  |  |  |  |  |  |  |  |  |  |  |  |  |  |  |  |  |  |  |  |  |  |  |  |  |  |  |  |  |  |  |  |  |  |  |  |  |  |  |  |  |  |  |  |  |  |  |  |  |  |  |  |  |  |  |  |  |  |  |  |  |  |  |  |  |  |  |  |  |  |  |  |  |  |  |  |  |  |  |  |  |  |  |  |  |  |  |  |  |  |  |  |  |  |  |  |  |  |  |  |  |  |  |  |  |  |  |  |  |  |  |  |  |  |  |  |  |  |  |  |  |  |  |  |  |  |  |  |  |  |  |  |  |  |  |  |  |  |  |  |  |  |    |
|---------------------------------|--|--|--|--|--|--|--|--|---|---|--|--|--|--|--|--|--|--|--|--|--|--|--|--|--|--|--|--|--|--|--|--|--|--|--|--|--|--|--|--|--|--|--|--|--|--|--|--|--|--|--|--|--|--|--|--|--|--|--|--|--|--|--|--|--|--|--|--|--|--|--|--|--|--|--|--|--|--|--|--|--|--|--|--|--|--|--|--|--|--|--|--|--|--|--|--|--|--|--|--|--|--|--|--|--|--|--|--|--|--|--|--|--|--|--|--|--|--|--|--|--|--|--|--|--|--|--|--|--|--|--|--|--|--|--|--|--|--|--|--|--|--|--|--|--|--|--|--|--|--|--|--|--|--|--|--|--|--|--|--|--|--|--|--|--|--|--|--|--|--|--|--|--|--|--|--|--|--|--|--|--|--|--|--|--|--|--|--|--|--|--|--|--|--|--|--|--|--|--|--|--|--|--|--|--|--|--|--|--|--|--|--|--|--|--|--|--|--|--|--|--|--|--|--|--|--|--|--|--|--|--|--|--|--|--|--|--|--|--|--|--|--|--|--|--|--|--|--|--|--|--|--|--|--|--|--|--|--|--|--|--|--|--|--|--|--|--|--|--|--|--|--|--|--|--|--|--|--|--|--|--|--|--|--|--|--|--|--|--|--|--|--|--|--|--|--|--|--|--|--|--|--|--|--|--|--|--|--|--|--|--|--|--|--|--|--|--|--|--|--|--|--|--|--|--|--|--|--|--|--|--|--|--|--|--|--|--|--|--|--|--|--|--|--|--|--|--|--|--|--|--|--|--|--|--|--|--|--|--|--|--|--|--|--|--|--|--|--|--|--|--|--|--|--|--|--|--|--|--|--|--|--|--|--|--|--|--|--|--|--|--|--|--|--|--|--|--|--|--|--|--|--|--|--|--|--|--|--|--|--|--|--|--|--|--|--|--|--|--|--|--|--|--|--|--|--|--|--|--|--|--|--|--|--|--|--|--|--|--|--|--|--|--|--|--|--|--|--|--|--|--|--|--|--|--|--|--|--|--|--|--|--|--|--|--|--|--|--|--|--|--|--|--|--|--|--|--|--|--|--|--|--|--|--|--|--|--|--|--|--|--|--|--|--|--|--|--|--|--|--|--|--|--|--|--|--|--|--|--|--|--|--|--|--|--|--|--|--|--|--|--|--|--|--|--|--|--|--|--|--|--|--|--|--|--|--|--|--|--|--|--|--|--|--|--|--|--|--|--|--|--|--|--|--|--|--|--|--|--|--|--|--|--|--|--|--|--|--|--|--|--|--|--|--|--|--|--|--|--|--|--|--|--|--|--|--|--|--|--|--|--|--|--|--|--|--|--|--|--|--|--|--|--|--|--|--|--|--|--|--|--|--|--|--|--|--|--|--|--|--|--|--|--|--|--|--|--|--|--|--|--|--|--|--|--|--|--|--|--|--|--|--|--|--|--|--|--|--|--|--|--|--|--|--|--|--|--|--|--|--|--|--|--|--|--|--|--|--|--|--|--|--|--|--|--|--|--|--|--|--|--|--|--|--|--|--|--|--|--|--|--|--|--|--|--|--|--|--|--|--|--|--|--|--|--|--|--|--|--|--|--|--|--|--|--|--|--|--|--|--|--|--|--|--|--|--|--|--|--|--|--|--|--|--|--|--|--|--|--|--|--|--|--|--|--|--|--|--|--|--|--|--|--|--|--|--|--|--|--|--|--|--|--|--|--|--|--|--|--|--|--|--|--|--|--|--|--|--|--|--|--|--|--|--|--|--|--|--|--|--|--|--|--|--|--|--|--|--|--|--|--|--|--|--|--|--|--|--|--|--|--|--|--|--|--|--|--|--|--|--|--|--|--|--|--|--|--|--|--|--|--|--|--|--|--|--|--|--|--|--|--|--|--|--|--|--|--|--|--|--|--|--|--|--|--|--|--|--|--|--|--|--|--|--|--|--|--|--|--|--|--|--|--|--|--|--|--|--|--|--|--|--|--|--|--|--|--|--|--|--|--|--|--|--|--|--|--|--|--|--|--|--|--|--|--|--|--|--|--|--|--|--|--|--|--|--|--|--|--|--|--|--|--|--|--|--|--|--|--|--|--|--|--|--|--|--|--|--|--|--|--|--|--|--|--|--|--|--|--|--|--|--|--|--|--|--|--|--|--|--|--|--|--|--|--|--|--|--|--|--|--|--|--|--|--|--|--|--|--|--|--|--|--|--|--|--|--|--|--|--|--|--|--|--|--|--|--|--|--|--|--|--|--|--|--|--|--|--|--|--|--|--|--|--|--|--|--|--|--|--|--|--|--|--|--|--|--|--|--|--|--|--|--|--|--|--|--|--|--|--|--|--|--|--|--|--|--|--|--|--|--|--|--|--|--|--|--|--|--|--|--|--|--|--|--|--|--|--|--|--|--|--|--|--|--|--|--|--|--|--|--|--|--|--|--|--|--|--|--|--|--|--|--|--|--|--|--|--|--|--|--|--|--|--|--|--|--|--|--|--|--|--|--|--|--|--|--|--|--|--|--|--|--|--|--|--|--|--|--|--|--|--|--|--|--|--|--|--|--|--|--|--|--|--|--|--|--|--|--|--|--|--|--|--|--|--|--|--|--|--|--|--|--|--|--|--|--|--|--|--|--|--|--|--|--|--|--|--|--|--|--|--|--|--|--|--|--|--|--|--|--|--|--|--|--|--|--|--|--|--|--|--|--|--|--|--|--|--|--|--|--|--|--|--|--|--|--|--|--|--|--|--|--|--|--|--|--|--|--|--|--|--|--|--|--|--|--|--|--|--|--|--|--|--|--|--|--|--|--|--|--|--|--|--|--|--|--|--|--|--|--|--|--|--|--|--|--|--|--|--|--|--|--|--|--|--|--|--|--|--|--|--|--|--|--|--|--|--|--|--|--|--|--|--|--|--|--|--|--|--|--|--|--|--|--|--|--|--|--|--|--|--|--|--|--|--|--|--|--|--|--|--|--|--|--|--|--|--|--|--|--|--|--|--|--|--|--|--|--|--|--|--|--|--|--|--|--|--|--|--|--|--|--|--|--|--|--|--|--|--|----|
| <i>Galium amorginum</i> Halácsy |  |  |  |  |  |  |  |  | x | x |  |  |  |  |  |  |  |  |  |  |  |  |  |  |  |  |  |  |  |  |  |  |  |  |  |  |  |  |  |  |  |  |  |  |  |  |  |  |  |  |  |  |  |  |  |  |  |  |  |  |  |  |  |  |  |  |  |  |  |  |  |  |  |  |  |  |  |  |  |  |  |  |  |  |  |  |  |  |  |  |  |  |  |  |  |  |  |  |  |  |  |  |  |  |  |  |  |  |  |  |  |  |  |  |  |  |  |  |  |  |  |  |  |  |  |  |  |  |  |  |  |  |  |  |  |  |  |  |  |  |  |  |  |  |  |  |  |  |  |  |  |  |  |  |  |  |  |  |  |  |  |  |  |  |  |  |  |  |  |  |  |  |  |  |  |  |  |  |  |  |  |  |  |  |  |  |  |  |  |  |  |  |  |  |  |  |  |  |  |  |  |  |  |  |  |  |  |  |  |  |  |  |  |  |  |  |  |  |  |  |  |  |  |  |  |  |  |  |  |  |  |  |  |  |  |  |  |  |  |  |  |  |  |  |  |  |  |  |  |  |  |  |  |  |  |  |  |  |  |  |  |  |  |  |  |  |  |  |  |  |  |  |  |  |  |  |  |  |  |  |  |  |  |  |  |  |  |  |  |  |  |  |  |  |  |  |  |  |  |  |  |  |  |  |  |  |  |  |  |  |  |  |  |  |  |  |  |  |  |  |  |  |  |  |  |  |  |  |  |  |  |  |  |  |  |  |  |  |  |  |  |  |  |  |  |  |  |  |  |  |  |  |  |  |  |  |  |  |  |  |  |  |  |  |  |  |  |  |  |  |  |  |  |  |  |  |  |  |  |  |  |  |  |  |  |  |  |  |  |  |  |  |  |  |  |  |  |  |  |  |  |  |  |  |  |  |  |  |  |  |  |  |  |  |  |  |  |  |  |  |  |  |  |  |  |  |  |  |  |  |  |  |  |  |  |  |  |  |  |  |  |  |  |  |  |  |  |  |  |  |  |  |  |  |  |  |  |  |  |  |  |  |  |  |  |  |  |  |  |  |  |  |  |  |  |  |  |  |  |  |  |  |  |  |  |  |  |  |  |  |  |  |  |  |  |  |  |  |  |  |  |  |  |  |  |  |  |  |  |  |  |  |  |  |  |  |  |  |  |  |  |  |  |  |  |  |  |  |  |  |  |  |  |  |  |  |  |  |  |  |  |  |  |  |  |  |  |  |  |  |  |  |  |  |  |  |  |  |  |  |  |  |  |  |  |  |  |  |  |  |  |  |  |  |  |  |  |  |  |  |  |  |  |  |  |  |  |  |  |  |  |  |  |  |  |  |  |  |  |  |  |  |  |  |  |  |  |  |  |  |  |  |  |  |  |  |  |  |  |  |  |  |  |  |  |  |  |  |  |  |  |  |  |  |  |  |  |  |  |  |  |  |  |  |  |  |  |  |  |  |  |  |  |  |  |  |  |  |  |  |  |  |  |  |  |  |  |  |  |  |  |  |  |  |  |  |  |  |  |  |  |  |  |  |  |  |  |  |  |  |  |  |  |  |  |  |  |  |  |  |  |  |  |  |  |  |  |  |  |  |  |  |  |  |  |  |  |  |  |  |  |  |  |  |  |  |  |  |  |  |  |  |  |  |  |  |  |  |  |  |  |  |  |  |  |  |  |  |  |  |  |  |  |  |  |  |  |  |  |  |  |  |  |  |  |  |  |  |  |  |  |  |  |  |  |  |  |  |  |  |  |  |  |  |  |  |  |  |  |  |  |  |  |  |  |  |  |  |  |  |  |  |  |  |  |  |  |  |  |  |  |  |  |  |  |  |  |  |  |  |  |  |  |  |  |  |  |  |  |  |  |  |  |  |  |  |  |  |  |  |  |  |  |  |  |  |  |  |  |  |  |  |  |  |  |  |  |  |  |  |  |  |  |  |  |  |  |  |  |  |  |  |  |  |  |  |  |  |  |  |  |  |  |  |  |  |  |  |  |  |  |  |  |  |  |  |  |  |  |  |  |  |  |  |  |  |  |  |  |  |  |  |  |  |  |  |  |  |  |  |  |  |  |  |  |  |  |  |  |  |  |  |  |  |  |  |  |  |  |  |  |  |  |  |  |  |  |  |  |  |  |  |  |  |  |  |  |  |  |  |  |  |  |  |  |  |  |  |  |  |  |  |  |  |  |  |  |  |  |  |  |  |  |  |  |  |  |  |  |  |  |  |  |  |  |  |  |  |  |  |  |  |  |  |  |  |  |  |  |  |  |  |  |  |  |  |  |  |  |  |  |  |  |  |  |  |  |  |  |  |  |  |  |  |  |  |  |  |  |  |  |  |  |  |  |  |  |  |  |  |  |  |  |  |  |  |  |  |  |  |  |  |  |  |  |  |  |  |  |  |  |  |  |  |  |  |  |  |  |  |  |  |  |  |  |  |  |  |  |  |  |  |  |  |  |  |  |  |  |  |  |  |  |  |  |  |  |  |  |  |  |  |  |  |  |  |  |  |  |  |  |  |  |  |  |  |  |  |  |  |  |  |  |  |  |  |  |  |  |  |  |  |  |  |  |  |  |  |  |  |  |  |  |  |  |  |  |  |  |  |  |  |  |  |  |  |  |  |  |  |  |  |  |  |  |  |  |  |  |  |  |  |  |  |  |  |  |  |  |  |  |  |  |  |  |  |  |  |  |  |  |  |  |  |  |  |  |  |  |  |  |  |  |  |  |  |  |  |  |  |  |  |  |  |  |  |  |  |  |  |  |  |  |  |  |  |  |  |  |  |  |  |  |  |  |  |  |  |  |  |  |  |  |  |  |  |  |  |  |  |  |  |  |  |  |  |  |  |  |  |  |  |  |  |  |  |  |  |  |  |  |  |  |  |  |  |  |  |  |  |  |  |  |  |  |  |  |  |  |  |  |  |  |  |  |  |  |  |  |  |  |  |  |  |  |  |  |  |  |  |  |  |  |  |  |  |  |  |  |  |  |  |  |  |  |  |  |  |  |  |  |  |  |  |  |  |  |  |  |  |  |  |  |  |  |  |  |  |  |  | </ |
|---------------------------------|--|--|--|--|--|--|--|--|---|---|--|--|--|--|--|--|--|--|--|--|--|--|--|--|--|--|--|--|--|--|--|--|--|--|--|--|--|--|--|--|--|--|--|--|--|--|--|--|--|--|--|--|--|--|--|--|--|--|--|--|--|--|--|--|--|--|--|--|--|--|--|--|--|--|--|--|--|--|--|--|--|--|--|--|--|--|--|--|--|--|--|--|--|--|--|--|--|--|--|--|--|--|--|--|--|--|--|--|--|--|--|--|--|--|--|--|--|--|--|--|--|--|--|--|--|--|--|--|--|--|--|--|--|--|--|--|--|--|--|--|--|--|--|--|--|--|--|--|--|--|--|--|--|--|--|--|--|--|--|--|--|--|--|--|--|--|--|--|--|--|--|--|--|--|--|--|--|--|--|--|--|--|--|--|--|--|--|--|--|--|--|--|--|--|--|--|--|--|--|--|--|--|--|--|--|--|--|--|--|--|--|--|--|--|--|--|--|--|--|--|--|--|--|--|--|--|--|--|--|--|--|--|--|--|--|--|--|--|--|--|--|--|--|--|--|--|--|--|--|--|--|--|--|--|--|--|--|--|--|--|--|--|--|--|--|--|--|--|--|--|--|--|--|--|--|--|--|--|--|--|--|--|--|--|--|--|--|--|--|--|--|--|--|--|--|--|--|--|--|--|--|--|--|--|--|--|--|--|--|--|--|--|--|--|--|--|--|--|--|--|--|--|--|--|--|--|--|--|--|--|--|--|--|--|--|--|--|--|--|--|--|--|--|--|--|--|--|--|--|--|--|--|--|--|--|--|--|--|--|--|--|--|--|--|--|--|--|--|--|--|--|--|--|--|--|--|--|--|--|--|--|--|--|--|--|--|--|--|--|--|--|--|--|--|--|--|--|--|--|--|--|--|--|--|--|--|--|--|--|--|--|--|--|--|--|--|--|--|--|--|--|--|--|--|--|--|--|--|--|--|--|--|--|--|--|--|--|--|--|--|--|--|--|--|--|--|--|--|--|--|--|--|--|--|--|--|--|--|--|--|--|--|--|--|--|--|--|--|--|--|--|--|--|--|--|--|--|--|--|--|--|--|--|--|--|--|--|--|--|--|--|--|--|--|--|--|--|--|--|--|--|--|--|--|--|--|--|--|--|--|--|--|--|--|--|--|--|--|--|--|--|--|--|--|--|--|--|--|--|--|--|--|--|--|--|--|--|--|--|--|--|--|--|--|--|--|--|--|--|--|--|--|--|--|--|--|--|--|--|--|--|--|--|--|--|--|--|--|--|--|--|--|--|--|--|--|--|--|--|--|--|--|--|--|--|--|--|--|--|--|--|--|--|--|--|--|--|--|--|--|--|--|--|--|--|--|--|--|--|--|--|--|--|--|--|--|--|--|--|--|--|--|--|--|--|--|--|--|--|--|--|--|--|--|--|--|--|--|--|--|--|--|--|--|--|--|--|--|--|--|--|--|--|--|--|--|--|--|--|--|--|--|--|--|--|--|--|--|--|--|--|--|--|--|--|--|--|--|--|--|--|--|--|--|--|--|--|--|--|--|--|--|--|--|--|--|--|--|--|--|--|--|--|--|--|--|--|--|--|--|--|--|--|--|--|--|--|--|--|--|--|--|--|--|--|--|--|--|--|--|--|--|--|--|--|--|--|--|--|--|--|--|--|--|--|--|--|--|--|--|--|--|--|--|--|--|--|--|--|--|--|--|--|--|--|--|--|--|--|--|--|--|--|--|--|--|--|--|--|--|--|--|--|--|--|--|--|--|--|--|--|--|--|--|--|--|--|--|--|--|--|--|--|--|--|--|--|--|--|--|--|--|--|--|--|--|--|--|--|--|--|--|--|--|--|--|--|--|--|--|--|--|--|--|--|--|--|--|--|--|--|--|--|--|--|--|--|--|--|--|--|--|--|--|--|--|--|--|--|--|--|--|--|--|--|--|--|--|--|--|--|--|--|--|--|--|--|--|--|--|--|--|--|--|--|--|--|--|--|--|--|--|--|--|--|--|--|--|--|--|--|--|--|--|--|--|--|--|--|--|--|--|--|--|--|--|--|--|--|--|--|--|--|--|--|--|--|--|--|--|--|--|--|--|--|--|--|--|--|--|--|--|--|--|--|--|--|--|--|--|--|--|--|--|--|--|--|--|--|--|--|--|--|--|--|--|--|--|--|--|--|--|--|--|--|--|--|--|--|--|--|--|--|--|--|--|--|--|--|--|--|--|--|--|--|--|--|--|--|--|--|--|--|--|--|--|--|--|--|--|--|--|--|--|--|--|--|--|--|--|--|--|--|--|--|--|--|--|--|--|--|--|--|--|--|--|--|--|--|--|--|--|--|--|--|--|--|--|--|--|--|--|--|--|--|--|--|--|--|--|--|--|--|--|--|--|--|--|--|--|--|--|--|--|--|--|--|--|--|--|--|--|--|--|--|--|--|--|--|--|--|--|--|--|--|--|--|--|--|--|--|--|--|--|--|--|--|--|--|--|--|--|--|--|--|--|--|--|--|--|--|--|--|--|--|--|--|--|--|--|--|--|--|--|--|--|--|--|--|--|--|--|--|--|--|--|--|--|--|--|--|--|--|--|--|--|--|--|--|--|--|--|--|--|--|--|--|--|--|--|--|--|--|--|--|--|--|--|--|--|--|--|--|--|--|--|--|--|--|--|--|--|--|--|--|--|--|--|--|--|--|--|--|--|--|--|--|--|--|--|--|--|--|--|--|--|--|--|--|--|--|--|--|--|--|--|--|--|--|--|--|--|--|--|--|--|--|--|--|--|--|--|--|--|--|--|--|--|--|--|--|--|--|--|--|--|--|--|--|--|--|--|--|--|--|--|--|--|--|--|--|--|--|--|--|--|--|--|--|--|--|--|--|--|--|--|--|--|--|--|--|--|--|--|--|--|--|--|--|--|--|--|--|--|--|--|--|--|--|--|--|--|--|--|--|--|--|--|--|--|--|--|--|--|--|--|--|--|--|--|--|--|--|--|--|--|--|--|--|--|--|--|--|--|--|--|--|--|--|--|--|--|--|--|--|--|--|--|--|--|----|

|                                                                                           |   |   |   |   |   |   |   |   |   |   |   |   |   |    |   |
|-------------------------------------------------------------------------------------------|---|---|---|---|---|---|---|---|---|---|---|---|---|----|---|
| <i>Heliosperma intonsum</i> (Greuter & Melzh.) Niketić & Stevan.                          | x |   |   |   |   |   |   |   |   |   |   |   |   | *  | H |
| <i>Heliosperma pusillum</i> (Waldst. & Kit.) Rchb.                                        | x | x | x | x |   | x |   |   |   |   |   |   |   | BC | H |
| <i>Heliosperma pusillum</i> subsp. <i>albanicum</i> (K.Malý) Niketić & Stevan.            | x | x | x | x |   | x |   |   |   |   |   |   |   | Bk | H |
| <i>Heliosperma pusillum</i> subsp. <i>chromodontum</i> (Boiss. & Reut.) Niketić & Stevan. | x |   |   |   |   | x |   |   |   |   |   |   |   | *  | H |
| <i>Hellenocarum multiflorum</i> (Sm.) H. Wolff                                            | x | x | x | x | x | x | x | x | x | x | x | x | x | Me | G |
| <i>Heptaptera colladonioides</i> Margot & Reut.                                           | x |   |   | x | x |   |   |   |   |   |   |   |   | *  | H |
| <i>Hesperis balansae</i> E. Fourn.                                                        |   |   |   |   |   |   |   |   |   |   |   | x |   | EM | H |
| <i>Hieracium bifidum</i> Hornem.                                                          | x |   |   | x | x | x | x |   |   |   |   |   |   | ES | H |
| <i>Hieracium bifidum</i> subsp. <i>caesiiflorum</i> (Norrl.) Zahn                         |   |   |   | x |   |   |   |   |   |   |   |   |   | Eu | H |
| <i>Hieracium bifidum</i> subsp. <i>cardiobasis</i> Zahn                                   |   |   |   |   |   |   | x |   |   |   |   |   |   | Eu | H |
| <i>Hieracium bifidum</i> subsp. <i>stenolepis</i> (Lindeb.) Zahn                          |   |   |   |   |   |   |   | x |   |   |   |   |   | Eu | H |
| <i>Hieracium bifidum</i> subsp. <i>thuringiacum</i> Zahn                                  |   |   |   |   |   |   |   | x |   |   |   |   |   | BC | H |
| <i>Hieracium chalcidicum</i> Boiss. & Heldr.                                              | x |   |   | x | x | x | x |   |   |   |   |   |   | BA | H |
| <i>Hieracium chalcidicum</i> Boiss. & Heldr. subsp. <i>chalcidicum</i>                    |   |   |   | x |   | x | x |   |   |   |   |   |   | Bk | H |
| <i>Hieracium chalcidicum</i> subsp. <i>divaricatum</i> (Fr.) Greuter                      |   |   |   | x |   |   | x |   |   |   |   |   |   | Bk | H |
| <i>Hieracium chalcidicum</i> subsp. <i>macropannosum</i> (Rech. f. & Zahn) Greuter        |   |   |   |   |   |   | x |   |   |   |   |   |   | *  | H |
| <i>Hieracium chalcidicum</i> subsp. <i>thessalum</i> (Formánek) Greuter                   |   |   |   |   |   | x |   |   |   |   |   |   |   | Bk | H |
| <i>Hieracium dasycraspedum</i> Buttler                                                    | x |   |   |   |   |   |   |   |   |   |   |   |   | *  | H |
| <i>Hieracium dimonieii</i> Zahn                                                           | x |   |   |   |   |   |   |   |   |   |   |   |   | Bk | H |
| <i>Hieracium ferdinandi-coburgii</i> J.Wagner & Zahn                                      | x | x |   |   |   | x |   |   |   |   |   |   |   | *  | H |
| <i>Hieracium gaudryi</i> Boiss. & Orph.                                                   | x |   |   |   | x |   | ? |   |   |   |   |   |   | BA | H |
| <i>Hieracium gaudryi</i> Boiss. & Orph. subsp. <i>gaudryi</i>                             |   |   |   |   | x |   |   |   |   |   |   |   |   | *  | H |
| <i>Hieracium gaudryi</i> subsp. <i>sibthorpiatum</i> Zahn                                 | x |   |   |   |   |   |   |   |   |   |   |   |   | *  | H |
| <i>Hieracium gracilifurcum</i> Zahn                                                       |   |   |   |   |   | x |   |   |   |   |   |   |   | *  | H |
| <i>Hieracium graecum</i> Boiss. & Heldr.                                                  | x |   |   | x | x | x | x | ? |   |   |   |   |   | *  | H |
| <i>Hieracium graecum</i> Boiss. & Heldr. subsp. <i>graecum</i>                            | x |   |   | x | x | x |   | ? |   |   |   |   |   | *  | H |
| <i>Hieracium greuteri</i> Gottschl.                                                       |   |   |   | x |   |   |   |   |   |   |   |   |   | *  | H |
| <i>Hieracium gymnocephalum</i> Pant.                                                      | x |   |   |   |   |   |   |   |   |   |   |   |   | Bk | H |
| <i>Hieracium heldreichii</i> Boiss.                                                       | x |   |   | x | x |   | x | x |   |   |   | x |   | Bk | H |
| <i>Hieracium heldreichii</i> Boiss. subsp. <i>heldreichii</i>                             | x |   |   | x | x |   | x |   |   |   |   |   |   | Bk | H |
| <i>Hieracium heldreichii</i> subsp. <i>charrelianum</i> Zahn                              |   |   |   |   |   |   | x |   |   |   |   |   |   | *  | H |
| <i>Hieracium jankae</i> R. Uechtr.                                                        |   |   |   |   |   | x | x |   |   |   |   |   |   | BA | H |
| <i>Hieracium jankae</i> subsp. <i>macranthelophorum</i> Rech. f. & Zahn                   |   |   |   |   |   | x | x |   |   |   |   |   |   | *  | H |
| <i>Hieracium jankae</i> subsp. <i>patentiratum</i> Rech. f. & Zahn                        |   |   |   |   |   |   | x |   |   |   |   |   |   | *  | H |

|                                                                                |   |   |   |   |   |   |   |   |   |   |    |   |
|--------------------------------------------------------------------------------|---|---|---|---|---|---|---|---|---|---|----|---|
| <i>Hieracium megalothecum</i> Zahn                                             |   |   |   |   |   | x |   |   |   |   | *  | H |
| <i>Hieracium naegelianum</i> Pančić                                            | x | x | x | x |   | x |   |   |   |   | BI | H |
| <i>Hieracium naegelianum</i> Pančić subsp. <i>naegelianum</i>                  | x | x | x | x |   | x |   |   |   |   | Bk | H |
| <i>Hieracium necopinum</i> Buttler                                             | x |   |   |   |   |   |   |   |   |   | *  | H |
| <i>Hieracium pannosum</i> Boiss.                                               | x | x | x | x | x | x | x | x | x |   | BA | H |
| <i>Hieracium pannosum</i> Boiss. subsp. <i>pannosum</i>                        | x |   |   |   | x | x | x |   |   |   | BA | H |
| <i>Hieracium pannosum</i> subsp. <i>euboeum</i> (Halácsy) Zahn                 |   |   |   | x | x |   |   |   |   | x | *  | H |
| <i>Hieracium pannosum</i> subsp. <i>friwaldii</i> (Rchb. f.) Freyn             |   | x |   |   | x | x | x | x | x |   | Bk | H |
| <i>Hieracium pannosum</i> subsp. <i>guicciardii</i> Zahn                       |   |   |   |   | x |   |   |   |   |   | *  | H |
| <i>Hieracium pannosum</i> subsp. <i>taygeteum</i> (Boiss. & Heldr.) Greuter    |   |   |   | x | x |   | x |   |   |   | Bk | H |
| <i>Hieracium parnassi</i> Fr.                                                  | x | x | x | x |   | x |   |   |   |   | *  | H |
| <i>Hieracium psaridianum</i> Zahn                                              |   |   |   | x |   |   |   |   |   |   | *  | H |
| <i>Hieracium sartorianum</i> Boiss. & Heldr.                                   | x | x | x | x |   |   | x |   |   | x | Bk | H |
| <i>Hieracium sartorianum</i> Boiss. & Heldr. subsp. <i>sartorianum</i>         | x |   |   | x | x |   | x |   |   |   | Bk | H |
| <i>Hieracium sartorianum</i> subsp. <i>koraxense</i> Zahn                      |   |   |   |   | x |   |   |   |   |   | *  | H |
| <i>Hieracium scapigerum</i> Boiss. & al.                                       |   |   |   | x | x |   | x |   |   |   | *  | H |
| <i>Hieracium scardicum</i> Bornm. & Zahn                                       | ? |   |   |   |   | ? | x |   |   |   | BA | H |
| <i>Hieracium schmidtii</i> subsp. <i>creticum</i> (Zahn) Greuter               |   |   |   |   |   |   |   |   |   | x | *  | H |
| <i>Hieracium schmidtii</i> subsp. <i>samoethracis</i> (Ade & Schack) Gottschl. |   |   |   |   |   |   |   |   | x |   | *  | H |
| <i>Hieracium schmidtii</i> subsp. <i>vranjanum</i> (Zahn) Greuter              |   |   |   |   | x |   | x |   |   |   | Bk | H |
| <i>Hieracium schmidtii</i> Tausch                                              |   |   |   |   | x |   | x |   | x | x | EA | H |
| <i>Hieracium sericophyllum</i> Nejčeff & Zahn                                  | x | x | x | x |   | x | x | x |   |   | BA | H |
| <i>Hieracium sericophyllum</i> subsp. <i>buxbaumii</i> Zahn                    |   |   |   |   |   | x |   |   |   |   | *  | H |
| <i>Hieracium sericophyllum</i> subsp. <i>chamaepannosum</i> Zahn               |   |   |   |   | x |   |   |   |   |   | *  | H |
| <i>Hieracium sericophyllum</i> subsp. <i>ericomum</i> Zahn                     |   |   |   | x |   | x | x | x |   |   | *  | H |
| <i>Hieracium sericophyllum</i> subsp. <i>fiedleri</i> Zahn                     |   | x | x |   |   |   |   |   |   |   | *  | H |
| <i>Hieracium sericophyllum</i> subsp. <i>olenium</i> Zahn                      |   |   |   | x | x |   | x |   |   |   | Bk | H |
| <i>Hieracium sericophyllum</i> subsp. <i>pilosius</i> (Buttler) Greuter        |   |   |   | x | x |   | x | x |   |   | *  | H |
| <i>Hieracium sparsum</i> Friv.                                                 | x |   |   |   | x |   | x | x |   |   | EA | H |
| <i>Hieracium sparsum</i> subsp. <i>acropolianthelum</i> Rech. f. & Zahn        |   |   |   |   |   |   |   | x |   |   | *  | H |
| <i>Hieracium sparsum</i> subsp. <i>macedonicum</i> (Boiss. & Orph.) Zahn       |   |   |   |   |   |   | x | x |   |   | Bk | H |
| <i>Hieracium sparsum</i> subsp. <i>naegelianiforme</i> O. Behr & al.           | x |   |   |   |   |   | x |   |   |   | Bk | H |
| <i>Hieracium sparsum</i> subsp. <i>paniculatisimum</i> (Zahn) Zahn             |   |   |   |   |   |   |   | x |   |   | Bk | H |
| <i>Hieracium triadanum</i> subsp. <i>sparsum</i>                               |   |   |   |   |   |   | x | x |   |   | BA | H |

|                                                                                |   |   |   |   |   |   |   |   |   |   |   |   |   |    |     |
|--------------------------------------------------------------------------------|---|---|---|---|---|---|---|---|---|---|---|---|---|----|-----|
| <i>Hieracium triadanum</i> Zahn                                                |   |   |   | x | x |   |   | x |   |   |   |   |   | *  | H   |
| <i>Hieracium trikalense</i> Buttler                                            | x | x |   |   |   |   |   |   |   |   |   |   |   | *  | H   |
| <i>Hieracium turbinellum</i> Zahn                                              |   |   |   |   | x |   |   | x |   |   |   |   |   | *  | H   |
| <i>Hieracium waldsteinii</i> subsp. <i>sublanifolium</i> Zahn                  | x |   |   |   |   |   |   |   |   |   |   |   |   | Bk | H   |
| <i>Hieracium waldsteinii</i> subsp. <i>suborieni</i> Zahn                      | x |   |   |   |   |   |   |   |   |   |   |   |   | Bk | H   |
| <i>Hieracium waldsteinii</i> Tausch                                            | x | x |   |   |   |   |   | x |   |   |   |   |   | Bk | H   |
| <i>Hippocrepis emerus</i> (L.) Lassen                                          | x | x | x | x | x | x | x | x | x | x | x |   | x | Eu | P   |
| <i>Hippocrepis emerus</i> subsp. <i>emeroides</i> (Boiss. & Spruner) Lassen    | x | x | x | x | x | x | x | x | x | x | x |   | x | EM | P   |
| <i>Hornungia petraea</i> (L.) Rechb.                                           | x | x | x | x | x | x | x | x | x | x |   | x | x | Me | T   |
| <i>Hyoscyamus albus</i> L.                                                     | x |   | x | x | x | x | x | x | x | x | x | x | x | Me | T H |
| <i>Hyoscyamus aureus</i> L.                                                    | x |   |   | x |   |   |   |   |   |   | x | x | x | EM | H   |
| <i>Hypericum aciferum</i> (Greuter) N. Robson                                  |   |   |   |   |   |   |   |   |   |   |   | x |   | *  | C   |
| <i>Hypericum aegypticum</i> L.                                                 | x |   |   | x |   |   |   |   |   |   |   | x |   | Me | C   |
| <i>Hypericum aegypticum</i> subsp. <i>webbii</i> (Spach) N. Robson             | x |   |   | x |   |   |   |   |   |   |   | x |   | Me | C   |
| <i>Hypericum amblycalyx</i> Coustur. & Gand.                                   |   |   |   |   |   |   |   |   |   |   |   | x |   | *  | C   |
| <i>Hypericum athoum</i> Boiss. & Orph.                                         |   |   |   |   |   |   |   | x | x |   |   |   |   | *  | H   |
| <i>Hypericum boehlingraabei</i> Kit Tan & al.                                  |   |   |   | x |   |   |   |   |   |   |   |   |   | *  | H   |
| <i>Hypericum cuisinii</i> Barbey                                               |   |   |   |   |   |   |   |   |   |   |   | x |   | *  | H   |
| <i>Hypericum empetrifolium</i> subsp. <i>oliganthum</i> (Rech. f.) I. Hagemann |   |   |   |   |   |   |   |   |   |   |   | x |   | *  | C   |
| <i>Hypericum empetrifolium</i> Willd.                                          | x |   |   | x | x | x |   | x | x | x | x | x | x | EM | C   |
| <i>Hypericum fragile</i> Boiss.                                                |   |   |   |   | ? |   |   |   |   | x |   |   |   | *  | H   |
| <i>Hypericum jovis</i> Greuter                                                 |   |   |   |   |   |   |   |   |   |   |   | x |   | *  | C   |
| <i>Hypericum montbretii</i> Spach                                              |   |   |   |   |   | x | x | x | x |   |   |   |   | EA | H   |
| <i>Hypericum taygeteum</i> Quézel & Contandr.                                  |   |   |   | x |   |   |   |   |   |   |   |   |   | *  | H   |
| <i>Hypochaeris achyrophorus</i> L.                                             | x | x | x | x | x | x | x | x | x | x | x | x | x | Me | T   |
| <i>Hyssopus officinalis</i> L.                                                 |   | x | x |   |   |   | x | x |   |   |   |   |   | EA | H   |
| <i>Hyssopus officinalis</i> subsp. <i>aristatus</i> (Godr.) Briq.              |   |   |   |   |   |   | x | x |   |   |   |   |   | EA | H   |
| <i>Iberis runemarkii</i> Greuter & Burdet                                      |   |   |   |   |   |   |   |   |   |   |   |   | x | *  | C   |
| <i>Iberis sempervirens</i> L.                                                  |   | x | x | x | x | x | x | x |   | x |   | x |   | Me | C   |
| <i>Inula candida</i> (L.) Cass.                                                |   |   |   | x | x |   |   |   | x |   | x |   |   | *  | H   |
| <i>Inula candida</i> (L.) Cass. subsp. <i>candida</i>                          |   |   |   | x |   |   |   |   |   |   |   | x |   | *  | H   |
| <i>Inula candida</i> subsp. <i>decalvans</i> (Halácsy) Tutin                   |   |   |   |   |   |   |   |   |   |   |   | x |   | *  | H   |
| <i>Inula candida</i> subsp. <i>limonella</i> (Heldr.) Rech. f.                 |   |   |   | x | x |   |   |   | x |   |   |   |   | *  | H   |
| <i>Inula subfloccosa</i> Rech. f.                                              |   |   |   |   |   |   |   |   | x |   |   |   |   | *  | H   |

|                                                                                      |   |   |   |   |   |   |   |   |   |   |   |   |    |   |
|--------------------------------------------------------------------------------------|---|---|---|---|---|---|---|---|---|---|---|---|----|---|
| <i>Inula verbascifolia</i> (Willd.) Hausskn.                                         | x |   | x | x | x | x | x | x | x |   | x | x | BI | H |
| <i>Inula verbascifolia</i> (Willd.) Hausskn. subsp. <i>verbascifolia</i>             | x |   | ? |   |   |   |   |   |   |   |   |   | BI | H |
| <i>Inula verbascifolia</i> subsp. <i>aschersoniana</i> (Janka) Tutin                 | ? |   |   |   | ? | x | x | x | x |   |   |   | BA | H |
| <i>Inula verbascifolia</i> subsp. <i>heterolepis</i> (Boiss.) Tutin                  |   |   |   |   |   |   |   |   |   |   | x | x | EM | H |
| <i>Inula verbascifolia</i> subsp. <i>methanaea</i> (Hausskn.) Tutin                  |   |   |   | x | x |   |   |   | x |   |   |   | *  | H |
| <i>Inula verbascifolia</i> subsp. <i>parnassica</i> (Boiss. & Heldr.) Tutin          |   |   |   | x | x |   | x |   | x |   |   |   | *  | H |
| <i>Jacobaea maritima</i> (L.) Pelser & Meijden                                       | x |   | x | x | x |   |   | x | x | x | x | x | Me | C |
| <i>Jacobaea maritima</i> (L.) Pelser & Meijden subsp. <i>maritima</i>                |   |   |   |   |   |   |   |   |   |   | x |   | Me | C |
| <i>Jacobaea maritima</i> subsp. <i>bicolor</i> (Willd.) B. Nord. & Greuter           | x |   | x | x | x |   |   | x | x | x |   | x | Me | C |
| <i>Jankaia heldreichii</i> (Boiss.) Boiss.                                           |   |   |   |   |   |   | x |   |   |   |   |   | *  | H |
| <i>Johrenia dichotoma</i> DC.                                                        |   |   |   |   |   |   |   |   |   |   |   | x | EM | H |
| <i>Juniperus communis</i> subsp. <i>nana</i> (Willd.) Syme                           |   | x | x | x | x | x | x | x |   | x |   |   | Ct | P |
| <i>Kernera saxatilis</i> (L.) Sweet                                                  |   |   |   |   |   |   | x |   |   |   |   |   | BC | H |
| <i>Klasea cretica</i> (Turrill) Holub                                                |   |   |   |   |   |   |   |   |   |   | x |   | *  | H |
| <i>Klasea moreana</i> Greuter                                                        |   |   |   | x |   |   |   |   |   |   |   |   | EM | H |
| <i>Lactuca acanthifolia</i> (Willd.) Boiss.                                          |   |   |   | x | x |   |   |   | x | x | x | x | EM | C |
| <i>Lactuca intricata</i> Boiss.                                                      |   | x | x | x | x |   | x |   | x |   |   | x | EM | H |
| <i>Lamyropsis carpini</i> Greuter                                                    |   | x |   |   |   |   |   |   |   |   |   |   | *  | G |
| <i>Leontodon crispus</i> Vill.                                                       | x | x | x | x | x | x | x | x | x | x |   |   | Me | H |
| <i>Leontodon hellenicus</i> Phitos                                                   |   |   | x |   | x |   |   |   |   |   |   |   | *  | H |
| <i>Leontodon hispidus</i> L.                                                         | x | x | x | x | x | x | x | x | x | x |   |   | EA | H |
| <i>Limonium cornarianum</i> Kypriot. & R. Artelari                                   |   |   |   |   |   |   |   |   |   |   | x |   | *  | C |
| <i>Linaria peloponnesiaca</i> Boiss. & Heldr.                                        | x | x | x | x | x | x | x | x |   | x |   |   | Bk | H |
| <i>Linum arboreum</i> L.                                                             |   |   |   |   |   |   |   |   |   | x | x | x | EM | C |
| <i>Linum caespitosum</i> Sm.                                                         |   |   |   |   |   |   |   |   |   |   | x |   | *  | C |
| <i>Linum gyaricum</i> subsp. <i>icaricum</i> Christod.                               |   |   |   |   |   |   |   |   |   |   |   | x | *  | C |
| <i>Linum gyaricum</i> Vierh. subsp. <i>gyaricum</i>                                  |   |   |   |   |   |   |   |   | x |   |   | x | *  | C |
| <i>Lithodora zahnii</i> (Halácsy) I.M. Johnst.                                       |   |   |   | x |   |   |   |   |   |   |   |   | *  | P |
| <i>Lomelosia albocincta</i> (Greuter) Greuter & Burdet                               |   |   |   |   |   |   |   |   |   |   | x |   | *  | C |
| <i>Lomelosia crenata</i> (Cirillo) Greuter & Burdet                                  | x | x | x | x | x |   | x |   |   |   |   |   | Me | C |
| <i>Lomelosia crenata</i> subsp. <i>breviscapa</i> (Boiss. & Heldr.) Greuter & Burdet |   |   |   | x |   |   |   |   |   |   |   |   | *  | C |
| <i>Lomelosia crenata</i> subsp. <i>dallaportae</i> (Boiss.) Greuter & Burdet         | x |   |   |   |   |   |   |   |   |   |   |   | BI | C |
| <i>Lomelosia hymettia</i> (Boiss. & Spruner) Greuter & Burdet                        |   |   |   | x | x |   |   |   | x |   |   |   | *  | C |
| <i>Lomelosia minoana</i> (P.H. Davis) Greuter & Burdet                               |   |   |   | ? |   |   |   |   |   |   | x |   | *  | C |

|                                                                                          |   |   |   |   |   |   |   |   |   |   |   |   |   |    |   |
|------------------------------------------------------------------------------------------|---|---|---|---|---|---|---|---|---|---|---|---|---|----|---|
| <i>Lomelosia minoana</i> (P.H. Davis) Greuter & Burdet subsp. <i>minoana</i>             |   |   |   |   |   |   |   |   |   |   |   | x |   | *  | C |
| <i>Lomelosia minoana</i> subsp. <i>asterusica</i> (Greuter) Greuter & Burdet             |   |   |   |   |   |   |   |   |   |   |   | x |   | *  | C |
| <i>Lomelosia variifolia</i> (Boiss.) Greuter & Burdet                                    |   |   |   |   |   |   |   |   |   |   |   | x | x | *  | C |
| <i>Macrotomia densiflora</i> (Ledeb.) McBride                                            |   |   |   |   | x | x |   |   |   |   |   |   |   | MS | C |
| <i>Malcolmia graeca</i> Boiss. & Spruner                                                 | x | x | x | x | x | x | x | x |   | x |   |   |   | Bk | T |
| <i>Malcolmia macrocalyx</i> (Halácsy) Rech. f.                                           |   |   |   |   |   |   |   |   | x |   | x |   |   | *  | T |
| <i>Marrubium velutinum</i> Sm.                                                           |   | x | x | x | x |   | x |   |   | x |   |   |   | Bk | T |
| <i>Matthiola incana</i> (L.) R. Br.                                                      | x |   | x | x | x | x |   | x | x | x | x | x | x | ME | H |
| <i>Medicago arborea</i> L.                                                               | x |   | x | x | x | x | x | x | x | x | x | x | x | Me | P |
| <i>Medicago arborea</i> L. subsp. <i>arborea</i>                                         | x |   | x | x | x | x | x | x | x | x | x | x | x | Me | P |
| <i>Medicago arborea</i> subsp. <i>strasserii</i> (Greuter & al.) Sobr.-Vest. & Ceresuela |   |   |   |   |   |   |   |   |   |   |   | x |   | *  | P |
| <i>Medicago truncatula</i> Gaertn.                                                       | x | x | x | x | x | x | x | x | x | x | x | x | x | MS | T |
| <i>Melica ciliata</i> L.                                                                 | x | x | x | x | x | x | x | x | x | x | x | x | x | MA | H |
| <i>Melica ciliata</i> L. subsp. <i>ciliata</i>                                           |   |   | x | x | x | x | x | x |   | x | x |   | x | Me | H |
| <i>Melica ciliata</i> subsp. <i>glauca</i> (F. W. Schultz) K. Richt.                     |   |   | x | x | x | x | x | x |   | x | x |   | x | Me | H |
| <i>Melica ciliata</i> subsp. <i>magnolii</i> (Gren. & Godr.) K. Richt.                   |   |   |   | x | x |   |   | x | x |   | x | x | x | MS | H |
| <i>Melica cretica</i> Boiss. & Heldr.                                                    |   | x | x | x | x |   | x | x | x | x |   | x | x | EM | H |
| <i>Melica cretica</i> Boiss. & Heldr. subsp. <i>cretica</i>                              |   |   |   | x |   |   |   |   | x |   |   | x |   | EM | H |
| <i>Melica cretica</i> subsp. <i>monticola</i> (Prokudin) W. Hempel                       |   | x | x | x | x |   | x | x |   |   |   | x |   | EM | H |
| <i>Melica minuta</i> L.                                                                  | x |   | x | x |   |   |   | x | x | x | x | x | x | Me | H |
| <i>Melica rectiflora</i> Boiss. & Heldr.                                                 |   |   | x | x |   |   |   |   |   |   | x | x |   | *  | H |
| <i>Micromeria acropolitana</i> Halácsy                                                   |   |   |   |   | x |   |   |   |   |   |   |   |   | *  | C |
| <i>Micromeria carpatha</i> Rech. f.                                                      |   |   |   |   |   |   |   |   |   |   |   | x |   | *  | C |
| <i>Micromeria cremnophila</i> Boiss. & Heldr.                                            |   | x | x | x | x |   | x |   |   |   |   |   |   | ES | C |
| <i>Micromeria cristata</i> (Hampe) Griseb.                                               |   | x |   |   |   |   | x | x | x |   |   |   |   | *  | C |
| <i>Micromeria hispida</i> Benth.                                                         |   |   |   |   |   |   |   |   |   |   |   | x |   | EM | C |
| <i>Micromeria myrtifolia</i> Boiss. & Hohen.                                             | x |   | x | x |   | x | x | x | x | x | x | x | x | Me | C |
| <i>Micromeria nervosa</i> (Desf.) Benth.                                                 | x |   | x | x | x | x | x | x | x | x | x | x | x | *  | C |
| <i>Micromeria sphaciotica</i> Benth.                                                     |   |   |   |   |   |   |   |   |   |   |   | x |   | *  | H |
| <i>Minuartia juniperina</i> (L.) Maire & Petitm.                                         |   | x | x | x |   |   |   |   |   | x |   |   |   | EM | H |
| <i>Minuartia pichleri</i> (Boiss.) Maire & Petitm.                                       |   |   |   | x |   |   |   |   |   |   |   |   |   | *  | H |
| <i>Minuartia stellata</i> (E.D. Clarke) Maire & Petitm.                                  |   |   | x | x | x |   |   |   |   | x |   |   |   | Bk | C |
| <i>Moltkia petraea</i> (Tratt.) Griseb.                                                  | x | x |   | ? |   |   |   |   |   |   |   |   |   | Bk | C |
| <i>Morina persica</i> L.                                                                 | x | x | x | x | x | x | x |   |   | x |   |   |   | MS | H |

|                                                                          |   |   |   |   |   |   |   |   |   |   |   |   |   |    |     |
|--------------------------------------------------------------------------|---|---|---|---|---|---|---|---|---|---|---|---|---|----|-----|
| <i>Myosotis alpestris</i> F.W. Schmidt                                   | x | x | x | x |   | x | x | x | x |   |   |   |   | EA | H   |
| <i>Myosotis speluncicola</i> (Boiss.) Rouy                               | x |   |   |   |   |   |   |   |   |   |   |   |   | Me | T   |
| <i>Nepeta camphorata</i> Boiss. & Heldr.                                 |   |   |   | x |   |   |   |   |   |   |   |   |   | *  | H   |
| <i>Nepeta melissifolia</i> Lam.                                          |   |   |   |   |   |   |   |   |   |   | x | x |   | *  | H   |
| <i>Nepeta parnassica</i> Boiss.                                          |   |   | x | x |   |   |   |   |   | x |   |   |   | Bk | H   |
| <i>Odontites linkii</i> Boiss.                                           |   |   |   | x | x | x | x |   |   | x |   | x | x | EM | H   |
| <i>Omphalodes luciliae</i> Boiss.                                        |   |   |   | x | x |   | x | x |   |   |   |   |   | EM | H   |
| <i>Omphalodes luciliae</i> subsp. <i>scopulorum</i> J.R. Edm.            |   |   |   | x | x |   | x | x |   |   |   |   |   | EM | H   |
| <i>Omphalodes runemarkii</i> Strid & Kit Tan                             |   |   |   | x |   |   |   |   |   |   |   |   |   | *  | H   |
| <i>Onobrychis sphaciotica</i> Greuter                                    |   |   |   |   |   |   |   |   |   |   |   | x |   | *  | H   |
| <i>Origanum calcaratum</i> Juss.                                         |   |   |   |   |   |   |   |   |   |   | x | x | x | *  | C   |
| <i>Origanum dictamnus</i> L.                                             |   |   |   |   |   |   |   |   |   |   |   | x |   | *  | C   |
| <i>Origanum onites</i> L.                                                | x |   | x | x |   |   |   |   | x | x | x | x | x | Me | C   |
| <i>Origanum scabrum</i> Boiss. & Heldr.                                  |   |   |   | x |   |   |   |   |   | x |   |   |   | *  | G   |
| <i>Origanum symes</i> Carlström                                          |   |   |   |   |   |   |   |   |   |   |   |   | x | *  | C   |
| <i>Origanum vetteri</i> Briq. & Barbey                                   |   |   |   |   |   |   |   |   |   |   |   | x |   | *  | C   |
| <i>Osyris alba</i> L.                                                    | x | x | x | x | x | x | x | x | x | x | x | x | x | Me | C   |
| <i>Paragymnopteris marantae</i> (L.) K.H. Shing                          |   | x | x | x | x | x | x | x | x | x |   |   | x | *  | C   |
| <i>Parietaria cretica</i> L.                                             | x | x | x | x | x | x |   | x | x | x | x | x | x | EM | P   |
| <i>Parietaria judaica</i> L.                                             | x | x | x | x | x | x | x | x | x | x | x | x | x | EA | H   |
| <i>Parietaria lusitanica</i> L.                                          | x | x | x | x | x | x |   | x | x | x | x | x | x | ME | T   |
| <i>Petromarula pinnata</i> (L.) A. DC.                                   |   |   |   |   |   |   |   |   |   |   |   | x |   | *  | H   |
| <i>Petrorhagia dianthoides</i> (Sm.) P.W. Ball & Heywood                 |   |   |   |   |   |   |   |   |   |   |   | x |   | *  | H   |
| <i>Petrorhagia grandiflora</i> Iatrou                                    |   |   |   | x |   |   |   |   |   |   |   |   |   | *  | H   |
| <i>Peucedanum arenarium</i> subsp. <i>neumayeri</i> (Vis.) Stoj. & Stef. |   | x |   |   |   |   | x | x |   |   |   |   |   | BA | H   |
| <i>Phagnalon rupestre</i> (L.) DC.                                       | x | x | x | x | x | x |   | x | x | x | x | x | x | Me | C   |
| <i>Phagnalon rupestre</i> (L.) DC. subsp. <i>rupestre</i>                | x |   | x | x | x |   |   | x |   |   | x | x | x | Me | C   |
| <i>Phagnalon rupestre</i> subsp. <i>graecum</i> (Boiss. & Heldr.) Batt.  | x | x | x | x | x | x |   | x | x | x | x | x | x | Me | C   |
| <i>Phagnalon saxatile</i> (L.) Cass.                                     | x |   |   | x | x |   |   |   |   |   | x | x |   | Me | C   |
| <i>Phitosia crocifolia</i> (Boiss. & Heldr.) Kamari & Greuter            |   |   |   | x |   |   |   |   |   |   |   |   |   | *  | H   |
| <i>Phleum alpinum</i> L.                                                 |   | x | x | x | x | x | x | x | x | x |   |   |   | AA | H   |
| <i>Pimpinella pretenderis</i> (Heldr.) Halácsy                           |   |   |   |   |   |   |   |   |   |   | x | ? |   | *  | H   |
| <i>Plocama calabrica</i> (L. f.) M. Backlund & Thulin                    | x | x | x | x | x | x | x |   |   | x |   | x | x | Me | C P |
| <i>Poa cenisia</i> All.                                                  |   | x | x | x | x |   | x |   |   | x |   | x |   | Eu | G   |

|                                                                                |   |   |   |   |   |   |   |   |   |   |   |   |   |    |   |
|--------------------------------------------------------------------------------|---|---|---|---|---|---|---|---|---|---|---|---|---|----|---|
| <i>Poa thessala</i> Boiss. & Orph.                                             |   | x | x | x | x | x | x | x | x | x |   |   |   | BA | H |
| <i>Polygonum icaricum</i> Rech. f.                                             |   |   |   |   |   |   |   |   | x |   |   |   | x | *  | C |
| <i>Polypodium cambricum</i> L.                                                 | x | x | x | x | x | x | x | x | x | x | x | x | x | MA | G |
| <i>Polypodium vulgare</i> L.                                                   | x | x | x | x | x | x | x | x | x | x |   |   |   | Ct | G |
| <i>Polystichum lonchitis</i> (L.) Roth                                         |   | x | x | x | x |   | x | x |   | x |   | x |   | AA | G |
| <i>Potentilla arcadiensis</i> Iatrouí                                          |   |   |   | x |   |   |   |   |   |   |   |   |   | *  | H |
| <i>Potentilla deorum</i> Boiss. & Heldr.                                       |   |   |   |   |   |   | x |   |   |   |   |   |   | *  | H |
| <i>Potentilla haynaldiana</i> Janka                                            |   |   |   |   |   |   |   | x |   |   |   |   |   | Bk | H |
| <i>Potentilla kionaea</i> Halácsy                                              |   |   |   |   | x |   |   |   |   |   |   |   |   | *  | H |
| <i>Potentilla speciosa</i> subsp. <i>illyrica</i> Soják                        |   | x |   |   |   |   |   |   |   |   |   |   |   | Bk | H |
| <i>Potentilla speciosa</i> Willd.                                              |   | x | x | x | x | x | x | x |   | x |   | x |   | BA | H |
| <i>Prangos ferulacea</i> (L.) Lindl.                                           |   | x | x | x | x |   |   | ? |   | x |   |   |   | EA | H |
| <i>Prunus graeca</i> (Lindl.) Steud.                                           |   |   |   |   |   |   |   |   |   |   |   |   | x | EM | P |
| <i>Prunus prostrata</i> Labill.                                                |   | x | x | x | x | x | x | x | x | x |   | x | x | Me | P |
| <i>Pseudofumaria alba</i> (Mill.) Lidén                                        |   | x |   |   |   |   | x |   |   |   |   |   |   | BA | T |
| <i>Pseudofumaria alba</i> subsp. <i>leiosperma</i> (Conrad) Lidén              |   | x |   |   |   |   | x |   |   |   |   |   |   | Bk | T |
| <i>Pteris vittata</i> L.                                                       | x |   |   | x |   |   |   |   |   | x |   | x | x | ST | G |
| <i>Pterocephalus perennis</i> Coult.                                           | x | x | x | x | x | x | x | x |   | x |   |   |   | BA | C |
| <i>Pterocephalus perennis</i> Coult. subsp. <i>perennis</i>                    |   |   |   | x | x | x | x | x |   | x |   |   |   | *  | C |
| <i>Pterocephalus perennis</i> subsp. <i>bellidifolius</i> (Boiss.) Vierh.      | x | x | x |   |   |   |   |   |   |   |   |   |   | Bk | C |
| <i>Pterocephalus pinardii</i> Boiss.                                           |   |   |   |   |   |   |   |   |   |   |   |   | x | EM | C |
| <i>Ptilostemon afer</i> (Jacq.) Greuter                                        |   | x | x | x | x | x | x | x | x | x |   |   |   | BA | H |
| <i>Ptilostemon chamaepeuce</i> (L.) Less.                                      | x |   | x | x | x | x | x | x |   | x | x | x | x | EM | C |
| <i>Ptilostemon gnaphaloides</i> (Cirillo) Soják                                | x |   |   | x | x |   |   | x |   | x |   | x | x | Me | C |
| <i>Ptilostemon gnaphaloides</i> (Cirillo) Soják subsp. <i>gnaphaloides</i>     | x |   |   |   |   |   |   |   |   |   |   |   |   | Me | C |
| <i>Ptilostemon gnaphaloides</i> subsp. <i>pseudofruticosus</i> (Pamp.) Greuter |   |   |   | x | x |   |   | x |   | x |   | x | x | EM | C |
| <i>Ramonda nathaliae</i> Pančić & Petrović                                     |   |   |   |   |   |   | x |   |   |   |   |   |   | Bk | H |
| <i>Ramonda serbica</i> Pančić                                                  |   | x |   |   |   |   | x |   |   |   |   |   |   | Bk | H |
| <i>Ranunculus brevifolius</i> Ten.                                             |   | x | x | x | x |   | x |   |   | x |   | x |   | BI | G |
| <i>Ranunculus creticus</i> L.                                                  |   |   |   |   |   |   |   |   |   |   | x | x | x | EM | H |
| <i>Ranunculus incomparabilis</i> Janka                                         |   |   |   |   |   |   | x | x |   |   |   |   |   | Bk | H |
| <i>Ranunculus subhomophyllus</i> (Halácsy) Vierh.                              |   |   |   | x |   |   |   |   |   |   |   | x |   | *  | H |
| <i>Ranunculus thasius</i> Halácsy                                              |   |   |   |   |   |   | x | x | x | x | x |   | x | *  | H |
| <i>Ranunculus veronicae</i> N. Böhling                                         |   |   |   |   |   |   |   |   |   |   |   | x |   | *  | H |

|                                                                              |   |   |   |   |   |   |   |   |   |   |   |   |   |    |     |
|------------------------------------------------------------------------------|---|---|---|---|---|---|---|---|---|---|---|---|---|----|-----|
| <i>Reichardia picroides</i> (L.) Roth                                        | x | x | x | x | x | x | x | x | x | x | x | x | x | Me | H   |
| <i>Rhamnus alpina</i> L.                                                     |   | x | x |   | x | x | x |   |   |   |   |   |   | Eu | P   |
| <i>Rhamnus alpina</i> subsp. <i>fallax</i> (Boiss.) Maire & Petitm.          |   | x | x |   | x | x | x |   |   |   |   |   |   | EM | P   |
| <i>Rhamnus lycioides</i> L.                                                  | x |   |   | x | x | x |   |   | x | x | x | x | x | Me | P   |
| <i>Rhamnus lycioides</i> subsp. <i>graeca</i> (Boiss. & Reut.) Tutin         | x |   |   | x | x | x |   |   |   |   | x | x | x | EM | P   |
| <i>Rhamnus pichleri</i> Bornm.                                               |   |   |   |   |   |   |   |   |   |   |   |   | x | EM | P   |
| <i>Rhamnus pumila</i> Turra                                                  |   |   |   |   | x |   | x |   |   |   |   |   |   | Me | P   |
| <i>Rhamnus saxatilis</i> Jacq.                                               | x | x | x | x | x | x | x | x | x | x | x | x | x | Eu | P   |
| <i>Rhamnus saxatilis</i> subsp. <i>prunifolia</i> (Sm.) Aldén                | x | x |   | x | x |   | x | x |   | x | x | x | x | Bk | P   |
| <i>Rhamnus sibthorpiana</i> Schult.                                          |   |   |   | x | x |   |   |   |   |   |   |   |   | *  | P   |
| <i>Rorippa icarica</i> Rech. f.                                              |   |   |   |   |   |   |   |   |   |   |   |   | x | *  | H   |
| <i>Rosa heckeliana</i> Tratt.                                                |   | x | x | x | x | x | x |   |   | x |   | x |   | BI | C   |
| <i>Rosa pendulina</i> L.                                                     |   | x | x |   |   |   | x | x |   |   |   |   |   | Eu | P   |
| <i>Rosa pulverulenta</i> M. Bieb.                                            |   | x | x | x | x | x | x | x | x | x |   | x | x | ME | P   |
| <i>Rosmarinus officinalis</i> L.                                             | x |   | x | x | x | x | x | x | x | x | x | x | x | Me | P   |
| <i>Rosularia serrata</i> (L.) A. Berger                                      |   |   |   | x |   |   |   |   |   |   | x | x | x | EM | H C |
| <i>Rumex scutatus</i> L.                                                     |   | x | x | x | x |   | x | x | x | x | x |   |   | EA | C   |
| <i>Ruta chalepensis</i> L.                                                   | x | x | x | x | x | x | x | x | x | x | x | x | x | Me | C   |
| <i>Ruta chalepensis</i> subsp. <i>fumariifolia</i> (Boiss. & Heldr.) Nyman   |   |   |   | x |   |   |   |   |   |   | x | x |   | *  | C   |
| <i>Ruta graveolens</i> L.                                                    | x | x | x | x | x | x | x | x | x | x | x | x |   | ME | C   |
| <i>Ruta montana</i> (L.) L.                                                  |   |   |   |   | x |   |   |   |   |   |   |   | ? | Me | C   |
| <i>Samolus valerandi</i> L.                                                  | x | x | x | x | x | x | x | x | x | x | x | x | x | Co | H   |
| <i>Sanguisorba cretica</i> Hayek                                             |   |   |   |   |   |   |   |   |   |   |   | x |   | *  | H   |
| <i>Sanguisorba rupicola</i> (Boiss. & Reut.) A. Braun & C.D. Bouché          |   |   |   |   |   |   | x |   |   |   |   |   |   | Me | H   |
| <i>Satureja athoa</i> K. Malý                                                |   |   |   |   |   |   |   | x |   |   |   |   |   | *  | C   |
| <i>Satureja hellenica</i> Halácsy                                            |   |   |   |   | x |   |   |   |   | x |   |   |   | *  | C   |
| <i>Satureja icarica</i> P.H. Davis                                           |   |   |   |   |   |   |   |   |   |   |   |   | x | *  | C   |
| <i>Satureja parnassica</i> Boiss.                                            |   |   | x | x | x |   |   |   |   |   |   |   |   | EM | C   |
| <i>Satureja parnassica</i> Boiss. subsp. <i>parnassica</i>                   |   |   | x | x | x |   |   |   |   |   |   |   |   | *  | C   |
| <i>Saxifraga adscendens</i> L.                                               | x | x | x | x | x | x | x | x |   |   |   |   |   | AA | H   |
| <i>Saxifraga adscendens</i> L. subsp. <i>adscendens</i>                      |   | x | x |   | x |   | x | x |   |   |   |   |   | AA | H   |
| <i>Saxifraga adscendens</i> subsp. <i>parnassica</i> (Boiss. & Heldr.) Hayek | x | x | x | x | x | x | x | x |   |   |   |   |   | BI | H   |
| <i>Saxifraga corymbosa</i> Boiss.                                            |   | x |   |   |   |   |   |   |   |   |   |   |   | BA | H   |
| <i>Saxifraga exarata</i> Vill.                                               |   | x |   | x | x |   | x | x |   | x |   |   |   | ME | H   |

|                                                                                       |   |   |   |   |   |   |   |   |   |   |   |   |   |    |    |   |
|---------------------------------------------------------------------------------------|---|---|---|---|---|---|---|---|---|---|---|---|---|----|----|---|
| <i>Saxifraga federici-augusti</i> Biasol.                                             |   | x | x |   |   |   |   | x |   |   |   |   |   |    | BA | H |
| <i>Saxifraga federici-augusti</i> Biasol. subsp. <i>federici-augusti</i>              |   | x |   |   |   |   |   |   |   |   |   |   |   |    | Bk | H |
| <i>Saxifraga federici-augusti</i> subsp. <i>grisebachii</i> (Degen & Dörf.) D.A. Webb |   | x |   |   |   |   |   | x |   |   |   |   |   |    | Bk | H |
| <i>Saxifraga ferdinandi-coburgi</i> Kellerer & Sünd.                                  |   |   |   |   |   |   |   |   |   | x |   |   |   |    | Bk | H |
| <i>Saxifraga hederacea</i> L.                                                         | x |   | x | x | x | x |   | x | x | x | x | x | x | EM | T  |   |
| <i>Saxifraga marginata</i> Sternb.                                                    |   | x | x | x | x |   |   |   |   |   |   |   |   | BI | H  |   |
| <i>Saxifraga oppositifolia</i> L.                                                     |   | x |   |   |   |   |   |   |   |   |   |   |   | AA | C  |   |
| <i>Saxifraga paniculata</i> Mill.                                                     |   | x | x | x | x |   | x | x |   | x |   |   |   | AA | H  |   |
| <i>Saxifraga pedemontana</i> subsp. <i>cymosa</i> Engl.                               |   |   |   |   |   |   | x |   |   |   |   |   |   | BC | C  |   |
| <i>Saxifraga rotundifolia</i> L.                                                      | x | x | x | x | x | x | x | x | x | x |   | x | x | Eu | H  |   |
| <i>Saxifraga rotundifolia</i> subsp. <i>chrysospleniiifolia</i> (Boiss.) D.A. Webb    | x | x | x | x | x | x | x | x | x | x |   | x | x | Bk | H  |   |
| <i>Saxifraga sancta</i> Griseb.                                                       |   |   |   |   |   |   |   | x |   |   |   |   |   | BA | C  |   |
| <i>Saxifraga scardica</i> Griseb.                                                     |   | x | x | x |   | x | x |   |   | x |   |   |   | Bk | C  |   |
| <i>Saxifraga sempervivum</i> K. Koch                                                  |   |   | x | x | x |   | x | x | x | x |   |   |   | BA | C  |   |
| <i>Saxifraga sibirica</i> L.                                                          |   |   |   |   |   |   |   |   | x |   |   |   | x | EA | H  |   |
| <i>Saxifraga sibthorpii</i> Boiss.                                                    |   |   |   | x | x |   |   |   |   | x |   |   |   | *  | H  |   |
| <i>Saxifraga spruneri</i> Boiss.                                                      |   |   |   | x | x |   | x |   |   |   |   |   |   | BK | C  |   |
| <i>Saxifraga stribnyi</i> (Velen.) Podp.                                              |   |   |   |   |   |   |   | x |   |   |   |   |   | Bk | H  |   |
| <i>Saxifraga taygetea</i> Boiss. & Heldr.                                             |   | x | x | x | x |   |   |   |   |   |   |   |   | BI | H  |   |
| <i>Saxifraga tridactylites</i> L.                                                     | x | x | x | x | x | x | x | x | x | x | x | x | x | EA | T  |   |
| <i>Scaligeria halophila</i> (Rech. f.) Rech. f.                                       |   |   |   |   |   |   |   |   |   |   | x | x |   | *  | H  |   |
| <i>Scaligeria napiformis</i> (Spreng.) Grande                                         | x | x | x | x | x | x | x | x | x | x | x | x | x | EM | H  |   |
| <i>Scorzonera araneosa</i> Sm.                                                        |   |   |   |   |   |   |   |   |   |   | x |   |   | *  | H  |   |
| <i>Scorzonera cretica</i> Willd.                                                      |   | ? |   | x |   |   |   |   |   |   | x | x | x | *  | H  |   |
| <i>Scorzonera scyria</i> M.A. Gust. & Snogerup                                        |   |   |   |   |   |   |   |   |   | x |   |   |   | *  | H  |   |
| <i>Scrophularia canina</i> L.                                                         | x | x | x | x | x | x | x | x | x | x | x |   | x | ME | H  |   |
| <i>Scrophularia heterophylla</i> Willd.                                               | x |   | x | x | x | x | x | x | x | x | x | x | x | EM | H  |   |
| <i>Scrophularia lucida</i> L.                                                         | x |   | x | x | x | x | x | x |   | x | x | x | x | Me | H  |   |
| <i>Scrophularia myriophylla</i> Boiss. & Heldr.                                       |   |   | x | x |   |   |   |   |   |   |   |   |   | EM | H  |   |
| <i>Scrophularia peregrina</i> L.                                                      | x | x | x | x | x | x | x | x | x | x | x | x | x | Me | T  |   |
| <i>Scrophularia pinardii</i> Boiss.                                                   |   |   |   |   |   |   |   |   |   |   |   |   | x | EM | C  |   |
| <i>Scutellaria albida</i> L.                                                          |   |   |   |   | x | x | x | x | x |   | x |   | x | MA | H  |   |
| <i>Scutellaria goulimyi</i> Rech. f.                                                  |   |   |   |   |   |   |   |   |   | x |   |   |   | *  | H  |   |
| <i>Scutellaria rupestris</i> Boiss. & Heldr.                                          | x | x | x | x | x | x | x |   |   | x |   |   |   | Bk | H  |   |

[illegible]

[illegible]
