# Supplementary material for: Linking Taxonomic, Phylogenetic and Functional Plant Diversity with Ecosystem Services of Cliffs and Screes in Greece
Source: Plants (Basel). 2021 May 17;10(5):992. doi: 10.3390/plants10050992 (PMC8156371; doi:10.3390/plants10050992)
Supplement: Supplementary file 1 [file plants-10-00992-s001.zip › Supplementary file Table S2.pdf]

# Supplementary file

**Table S2.** Plant taxa occurring on cliffs and screes in mid- to high-altitudes and their functional traits concerning life form, longevity, growth form, petal color, pollination type and dispersal mode.

| Taxon                                                                    | Longevity | Growth form   | Life form | Pollination type | Fruit type           | Dispersal mode | Petal Color                    |
|--------------------------------------------------------------------------|-----------|---------------|-----------|------------------|----------------------|----------------|--------------------------------|
| <i>Achillea abrotanoides</i> (Vis.) Vis.                                 | perennial | suffruticose  | C         | entomogamy       | achenes              | anemochory     | white                          |
| <i>Achillea ambrosiaca</i> (Boiss. & Heldr.) Boiss.                      | perennial | caespitose    | C         | entomogamy       | achenes              | anemochory     | white                          |
| <i>Achillea fraasii</i> Sch. Bip.                                        | perennial | caespitose    | H         | entomogamy       | achenes              | anemochory     | white                          |
| <i>Achillea holosericea</i> Sm.                                          | perennial | caespitose    | H         | entomogamy       | achenes              | anemochory     | yellow                         |
| <i>Achillea umbellata</i> Sm.                                            | perennial | subcaespitose | C         | entomogamy       | achenes              | anemochory     | white                          |
| <i>Acinos alpinus</i> (L.) Moench                                        | perennial | caespitose    | H         | entomogamy       | achenes              | barochory      | violet with white markings     |
| <i>Aetheorhiza bulbosa</i> (L.) Cass.                                    | perennial | scapose       | G         | entomogamy       | achenes              | epizoochory    | yellow                         |
| <i>Aethionema saxatile</i> (L.) R. Br.                                   | perennial | suffruticose  | C         | entomogamy       | siliques             | anemochory     | white, pink, purplish or lilac |
| <i>Alchemilla ampliargyrea</i> Buser                                     | perennial | rosulate      | H         | apogamy          | achenes              | zoochory       |                                |
| <i>Alchemilla aroanica</i> (Buser) Rothm.                                | perennial | rosulate      | H         | apogamy          | achene               | zoochory       | yellow                         |
| <i>Allium frigidum</i> Boiss. & Heldr.                                   | perennial | scapose       | G         | entomogamy       | membranous capsule   | barochory      | yellowish or pink              |
| <i>Allium subhirsutum</i> L.                                             | perennial | scapose       | G         | entomogamy       | membranous capsule   | barochory      | white                          |
| <i>Alopecurus gerardii</i> Vill.                                         | perennial | scapose       | G         | anemogamy        | caryopsis            | barochory      |                                |
| <i>Alyssum montanum</i> L.                                               | perennial | caespitose    | C         | entomogamy       | siliques             | anemochory     | yellow                         |
| <i>Amelanchier ovalis</i> Medik.                                         | perennial | fruticose     | P         | entomogamy       | drupe                | endozoochory   | white                          |
| <i>Amelanchier ovalis</i> subsp. <i>cretica</i> (Willd.) Maire & Petitm. | perennial | fruticose     | P         | entomogamy       | pome                 | endozoochore   | white                          |
| <i>Amelanchier ovalis</i> Medik. subsp. <i>ovalis</i>                    | perennial | fruticose     | P         | entomogamy       | pome                 | endozoochore   | white                          |
| <i>Amelanchier parviflora</i> Boiss.                                     | perennial | fruticose     | P         | entomogamy       | berry-like structure | zoochory       |                                |
| <i>Amelanchier parviflora</i> subsp. <i>chelmea</i> (Halácsy) Ziel.      | perennial | fruticose     | P         | entomogamy       | berry-like pome      | zoochory       |                                |

|                                                                               |                      |             |     |                      |             |             |                               |
|-------------------------------------------------------------------------------|----------------------|-------------|-----|----------------------|-------------|-------------|-------------------------------|
| <i>Amelanchier parviflora</i> subsp. <i>dentata</i> (Boiss.) K.I. Chr.        | perennial            | sufruticose | P   | entomogamy           | small berry | zoochory    |                               |
| <i>Anthyllis aurea</i> Host                                                   | perennial            | sufruticose | C   | entomogamy           | legume      | epizoochory | bright yellow                 |
| <i>Aquilegia ottonis</i> Boiss.                                               | perennial            | caespitose  | H   | entomogamy           | follicles   | zoochory    | sky-blue to violet blue       |
| <i>Aquilegia ottonis</i> subsp. <i>amaliae</i> (Boiss.) Strid                 | perennial            | caespitose  | H   | entomogamy           | follicles   | epizoochory | whitish or pale blue          |
| <i>Aquilegia ottonis</i> Boiss. subsp. <i>ottonis</i>                         | perennial            | caespitose  | H   | entomogamy           | follicles   | epizoochory | whitish or pale blue          |
| <i>Arabis alpina</i> L.                                                       | perennial            | caespitose  | H   | entomogamy, autogamy | siliqua     | anemochory  | white                         |
| <i>Arabis bryoides</i> Boiss.                                                 | perennial            | caespitose  | H   | entomogamy           | siliqua     | anemochory  | white                         |
| <i>Arenaria conferta</i> Boiss.                                               | biennial short-lived | caespitose  | T   | entomogamy           | capsule     | epizoochory | white                         |
| <i>Arenaria cretica</i> Spreng.                                               | perennial            | caespitose  | C   | entomogamy           | siliqua     | barochory   | pale rose-pink                |
| <i>Arenaria filicaulis</i> Fenzl                                              | perennial            | caespitose  | C H | entomogamy           | capsule     | barochory   | white                         |
| <i>Arenaria filicaulis</i> Fenzl subsp. <i>filicaulis</i>                     | perennial            | caespitose  | C H | entomogamy           | capsule     | barochory   | white                         |
| <i>Arenaria filicaulis</i> subsp. <i>teddii</i> (Turrill) Strid               | perennial            | caespitose  | C H | entomogamy           | capsule     | barochory   | white                         |
| <i>Arenaria fragillima</i> Rech. f.                                           | perennial            | caespitose  | C   | entomogamy           | capsule     | barochory   | white (rarely pink or purple) |
| <i>Arenaria gionae</i> Gustavsson                                             | perennial            | caespitose  | H   | entomogamy           | capsule     | barochory   | white                         |
| <i>Arenaria graveolens</i> Schreb.                                            | perennial            | caespitose  | T   | entomogamy           | capsule     | barochory   | white                         |
| <i>Asperula aristata</i> L. f.                                                | perennial            | caespitose  | H   | entomogamy           | capsule     | barochory   | yellow                        |
| <i>Asperula muscosa</i> Boiss. & Heldr.                                       | perennial            | caespitose  | H   | entomogamy           | capsule     | barochory   | white                         |
| <i>Asperula purpurea</i> (L.) Ehrend.                                         | perennial            |             | C   | entomogamy           | capsule     | barochory   | red                           |
| <i>Asplenium adiantum-nigrum</i> L.                                           | Perennial            | rosulate    | H   | hydrogamy            | spores      | autochory   |                               |
| <i>Asplenium aegaeum</i> Lovis & al.                                          | Perennial            | rosulate    | H   | hydrogamy            | spores      | autochory   |                               |
| <i>Asplenium ceterach</i> L.                                                  | perennial            | caespitose  | H   | hydrogamy            | spores      | autochory   |                               |
| <i>Asplenium creticum</i> Lovis & al.                                         | Perennial            | rosulate    | H   | hydrogamy            | spores      | autochory   |                               |
| <i>Asplenium cuneifolium</i> Viv.                                             | Perennial            | caespitose  | H   | hydrogamy            | spores      | autochory   |                               |
| <i>Asplenium fissum</i> Willd.                                                | Perennial            | rosulate    | H   | hydrogamy            | spores      | autochory   |                               |
| <i>Asplenium lepidum</i> C. Presl                                             | Perennial            | caespitose  | H   | hydrogamy            | spores      | autochory   |                               |
| <i>Asplenium lepidum</i> subsp. <i>haussknechtii</i> (Godet & Reut.) Brownsey | Perennial            | rosulate    | H   | hydrogamy            | spores      | autochory   |                               |
| <i>Asplenium lepidum</i> C. Presl subsp. <i>lepidum</i>                       | Perennial            | caespitose  | H   | hydrogamy            | spores      | autochory   |                               |
| <i>Asplenium ruta-muraria</i> L.                                              | Perennial            | rosulate    | H   | hydrogamy            | spores      | autochory   |                               |

|                                                                                      |                     |                    |   |                         |            |              |                                                                           |
|--------------------------------------------------------------------------------------|---------------------|--------------------|---|-------------------------|------------|--------------|---------------------------------------------------------------------------|
| <i>Asplenium scolopendrium</i> L.                                                    | Perennial           | rosulate           | H | hydrogamy               | spores     | autochory    |                                                                           |
| <i>Asplenium scolopendrium</i> subsp. <i>antri-jovis</i> (Kümmerle) Brownsey & Jermy | Perennial           | rosulate           | H | hydrogamy               | spores     | autochory    |                                                                           |
| <i>Asplenium septentrionale</i> (L.) Hoffm.                                          | Perennial           | caespitose         | H | hydrogamy               | spores     | autochory    |                                                                           |
| <i>Asplenium trichomanes</i> subsp. <i>inexpectans</i> Lovis                         | Perennial           | rhizome caespitose | H | hydrogamy               | spores     | autochory    |                                                                           |
| <i>Asplenium trichomanes</i> subsp. <i>pachyrachis</i> (H. Christ) Lovis & Reichst.  | Perennial           | caespitose         | H | hydrogamy               | spores     | autochory    |                                                                           |
| <i>Asplenium trichomanes</i> subsp. <i>quadrivalens</i> D.E. Mey.                    | Perennial           | chizome caespitose | H | hydrogamy               | spores     | autochory    |                                                                           |
| <i>Asplenium trichomanes</i> L. subsp. <i>trichomanes</i>                            | Perennial           | rhizome caespitose | H | hydrogamy               | spores     | autochory    |                                                                           |
| <i>Asplenium viride</i> Huds.                                                        | Perennial           | caespitose         | H | hydrogamy               | spores     | autochory    |                                                                           |
| <i>Astragalus creticus</i> Lam.                                                      | perennial           | caespitose         | C | entomogamy              | legume     | barochory    | pinkish                                                                   |
| <i>Astragalus mayeri</i> Micevski                                                    | Perennial           | fruticose          | C | entomogamy              | legume     | zoochory     |                                                                           |
| <i>Asyneuma limonifolium</i> (L.) Janch.                                             | perennial           | caespitose         | H | entomogamy              | capsule    | barochory    | purple                                                                    |
| <i>Athamanta densa</i> Boiss. & Orph.                                                | Perennial           | caespitose         | H | entomogamy              | schizocarp | epizoochory  |                                                                           |
| <i>Aubrieta deltoidea</i> (L.) DC.                                                   | perennial           | caespitose         | C | entomogamy              | silique    | barochory    | purple<br>pinkish at first,<br>later white                                |
| <i>Aubrieta erubescens</i> Griseb.                                                   | Perennial           | caespitose         | H | entomogamy              | siliqua    | barochory    |                                                                           |
| <i>Aubrieta thessala</i> Boissieu                                                    | Perennial           | caespitose         | H | entomogamy              | siliqua    | barochory    | purple                                                                    |
| <i>Aurinia moreana</i> Tzanoud. & Iatrou                                             | Perennial           |                    | H | entomogamy              | silicula   | barochory    | yellow                                                                    |
| <i>Aurinia saxatilis</i> (L.) Desv.                                                  | perennial           | caespitose         | H | entomogamy              | silicula   | barochory    | yellow                                                                    |
| <i>Berberis cretica</i> L.                                                           | perennial           | caespitose         | P | entomogamy              | berry      | endozoochory | yellow                                                                    |
| <i>Bornmuellera baldaccii</i> (Degen) Heywood                                        | perennial           | sufruticose        | H | entomogamy              | silicula   |              | white                                                                     |
| <i>Bromus tomentellus</i> Boiss.                                                     | perennial           | caespitose         | H | anemogamy               | caryopsis  | epizoochory  |                                                                           |
| <i>Bupleurum trichopodium</i> Boiss. & Spruner                                       | annual              | scapose            | T | entomogamy              | schizocarp | Barochory    | yellow                                                                    |
| <i>Campanula hawkinsiana</i> Hausskn. & Heldr.                                       | perennial           | caespitose         | H | entomogamy              | capsule    | barochory    | blue-violet                                                               |
| <i>Cardamine carnosa</i> Waldst. & Kit.                                              | perennial           | caespitose         | H | entomogamy              | silicues   | anemochory   | white                                                                     |
| <i>Cardamine glauca</i> DC.                                                          | annual to perennial | caespitose         | T | entomogamy              | silicues   | anemochory   | white                                                                     |
| <i>Carduus tmoleus</i> Boiss.                                                        | perennial           |                    | H | entomogamy,<br>autogamy | achene     | anemochory   | pink or white<br>white or<br>yellowish<br>white or<br>yellowish-<br>white |
| <i>Carum graecum</i> Boiss. & Heldr.                                                 | perennial           | suffruticose       | H | entomogamy              | schizocarp | barochory    |                                                                           |
| <i>Carum heldreichii</i> Boiss.                                                      | perennial           | scapose            | H | entomogamy              | schizocarp | barochory    |                                                                           |

|                                                                                      |                        |                       |   |                                       |                            |              |                                            |
|--------------------------------------------------------------------------------------|------------------------|-----------------------|---|---------------------------------------|----------------------------|--------------|--------------------------------------------|
| <i>Centranthus longiflorus</i> subsp. <i>junceus</i> (Boiss. & Heldr.) I. Richardson | perennial              | caespitose            | H | entomogamy                            | achene                     | anemochory   | pink or lilac<br>white- to<br>yellowish    |
| <i>Cerastium candidissimum</i> Correns                                               | perennial              | caespitose            | H | entomogamy<br>entomogamy,<br>autogamy | capsule                    | anemochory   |                                            |
| <i>Cirsium heldreichii</i> Halácsy                                                   | biennial               | scapose               | H |                                       | achenes                    | anemochory   | white                                      |
| <i>Cirsium morinifolium</i> Boiss. & Heldr.                                          | biennial               | scapose               | H | entomogamy                            | achenes                    | anemochory   | white                                      |
| <i>Cotoneaster integerrimus</i> Medik.                                               | perennial              | fruticose             | P | entomogamy                            | pome                       | endozoochory | pink                                       |
| <i>Cotoneaster nummularius</i> Fisch. & C.A. Mey.                                    | perennial              | fruticose             | P | entomogamy                            | pome                       | zoochory     | white                                      |
| <i>Cotoneaster tomentosus</i> (Aiton) Lindl.                                         | perennial              | Fruticose             | P | entomogamy                            | pome                       | endozoochory | reddish                                    |
| <i>Crepis neglecta</i> subsp. <i>graeca</i> (Vierh.) Rech. f.                        | annual                 | scapose               | T | entomogamy                            | achenes                    | anemochory   | yellow                                     |
| <i>Cyclamen graecum</i> Link                                                         | perennial              | bulbose               | G | entomogamy                            | capsule                    | myrmecochory |                                            |
| <i>Cystopteris alpina</i> (Lam.) Desv.                                               | perennial              | caespitose            | G | hydrogamy                             | spores                     | autochory    |                                            |
| <i>Cystopteris fragilis</i> (L.) Bernh.                                              | perennial              | caespitose            | G | hydrogamy                             | spores                     | autochory    |                                            |
| <i>Daphne oleoides</i> Schreb.                                                       | perennial<br>evergreen | caespitose            | C | entomogamy                            | drupe                      | epizoochory  | white or cream<br>rarely pink              |
| <i>Dianthus juniperinus</i> Sm.                                                      | perennial              | suffruticose          | C | entomogamy                            | capsule                    | zoochory     | pale pink with<br>darker stripes           |
| <i>Dianthus juniperinus</i> subsp. <i>heldreichii</i> Greuter                        | perennial              | suffruticose          | C | entomogamy                            | capsule                    | zoochory     | bright pink,<br>with a few<br>purple spots |
| <i>Dianthus juniperinus</i> subsp. <i>bauhinorum</i><br>(Greuter) Turland            | perennial              | suffruticose          | C | entomogamy                            | capsule                    | zoochory     | red                                        |
| <i>Dianthus juniperinus</i> subsp. <i>pulviniformis</i><br>(Greuter) Turland         | perennial              | suffruticose          | C | entomogamy                            | capsule                    | zoochory     | red                                        |
| <i>Dianthus pinifolius</i> Sm.                                                       | perennial              | densely<br>caespitose | H | entomogamy                            | capsule                    | zoochory     | pinkish-purple<br>to lilac                 |
| <i>Dianthus sylvestris</i> Wulfen                                                    | perennial              | densely<br>caespitose | H | entomogamy                            | capsule                    | zoochory     | pink or pale<br>pink                       |
| <i>Doronicum columnae</i> Ten.                                                       | perennial              | scapose<br>densely    | H | entomogamy                            | achenes                    | anemochory   |                                            |
| <i>Draba lacaitae</i> Boiss.                                                         | perennial              | caespitose            | H | entomogamy                            | siliqua                    | anemochory   | light to vivid<br>yellow                   |
| <i>Draba lasiocarpa</i> Rochel                                                       | perennial              | caespitose<br>densely | H | entomogamy                            | siliqua<br>satiseptate/lik | anemochory   | bright yellow<br>light to vivid            |
| <i>Draba parnassica</i> Boiss. & Heldr.                                              | perennial              | caespitose<br>rhizome | H | entomogamy                            | e silicles                 | anemochory   | yellow                                     |
| <i>Dryopteris villarii</i> (Bellardi) Schinz & Thell.                                | perennial              | caespitose            | G | hydrogamy                             | spores                     | autochory    |                                            |
| <i>Drypis spinosa</i> L.                                                             | perennial              | caespitose            | H |                                       | capsule                    |              | white or pale<br>pinkish                   |
| <i>Ephedra foeminea</i> Forssk.                                                      | perennial              |                       | P | anemogamy                             | berry                      | endozoochory | yellow                                     |

|                                                                                   |                             |              |   |                         |               |              |                      |
|-----------------------------------------------------------------------------------|-----------------------------|--------------|---|-------------------------|---------------|--------------|----------------------|
| <i>Epilobium collinum</i> C.C. Gmel.                                              | perennial                   | caespitose   | H | entomogamy              | capsule       | anemochory   | purplish-pink        |
| <i>Eryngium amethystinum</i> L.                                                   | perennial                   |              | H | entomogamy,<br>autogamy | schizocarp    | epizoochory  |                      |
| <i>Erysimum microstylum</i> Hausskn.                                              |                             |              | H | entomogamy              | siliquas      | anemochory   | yellow               |
| <i>Euphorbia characias</i> L.                                                     | perennial                   | caespitose   | H | entomogamy              | capsule       | anemochory   |                      |
| <i>Euphorbia deflexa</i> Sm.                                                      | perennial                   | caespitose   | H | entomogamy              | capsule       | anemochory   |                      |
| <i>Euphorbia herniariifolia</i> Willd.                                            | perennial                   | caespitose   | H | entomogamy              | capsule       | barochory    |                      |
| <i>Festuca polita</i> (Halácsy) Tzvelev                                           | perennial                   | caespitose   | H | anemogamy               | caryopsis     | epizoochory  |                      |
| <i>Festuca spectabilis</i> Bertol.                                                | perennial                   | caespitose   | H | anemogamy               | caryopsis     | epizoochory  |                      |
| <i>Galium incanum</i> Sm.                                                         | perennial                   | caespitose   | C | entomogamy              | capsule       | barochory    | white or pink        |
| <i>Galium thymifolium</i> Boiss. & Heldr.                                         | perennial                   | caespitose   | H | entomogamy              | capsule       | barochory    | white                |
|                                                                                   |                             |              | G |                         |               |              | pale blue            |
| <i>Geranium aristatum</i> Freyn & Sint.                                           | perennial                   | suffruticose |   | entomogamy              | capsule       | autochory    | whitish-lilac        |
| <i>Geranium macrorrhizum</i> L.                                                   | perennial                   | scapose      | G | entomogamy              | capsule       | epizoochory  | with lilac veins     |
| <i>Geranium subcaulescens</i> DC.                                                 | perennial                   | caespitose   | G | entomogamy              | capsule       | autochory    | purplish red         |
| <i>Geum reptans</i> L.                                                            | Perennial                   | caespitose   | H | entomogamy              | schene-Nutlet | zoochory     | reddish purple       |
|                                                                                   |                             |              |   |                         |               |              | yellow               |
|                                                                                   |                             |              |   |                         |               |              | usually very         |
|                                                                                   |                             |              |   |                         |               |              | pale pink            |
|                                                                                   |                             |              |   |                         |               |              | sometimes            |
|                                                                                   |                             |              |   |                         |               |              | persistently         |
| <i>Gypsophila nana</i> Bory & Chaub.                                              | perennial                   | caespitose   | H | entomogamy              | sapsule       | anemochory   | white.               |
| <i>Heliosperma pusillum</i> (Waldst. & Kit.) Rchb.                                | perennial<br>biennial<br>or | caespitose   | H | entomogamy              | sapsule       | anemochory   | pink or pale<br>pink |
| <i>Hellenocarum multiflorum</i> (Sm.) H. Wolff                                    | perennial                   |              | G | entomogamy              | schizocarp    | barochory    | white                |
| <i>Hippocrepis emerus</i> (L.) Lassen                                             | perennial                   | fruticose    | P | entomogamy              | legume        | epizoochory  | yellow               |
| <i>Hornungia petraea</i> (L.) Rchb.                                               | Annual                      |              | T |                         | siliquula     |              | white                |
| <i>Hypericum athoum</i> Boiss. & Orph.                                            | perennial                   | caespitose   | H | entomogamy              | capsule       | barochory    | pale yellow          |
| <i>Hypericum empetrifolium</i> Willd.                                             | perennial                   | caespitose   | C | entomogamy              | capsule       | anemochory   | Yellow               |
| <i>Hypericum empetrifolium</i> subsp. <i>oliganthum</i><br>(Rech. f.) I. Hagemann | perennial                   | caespitose   | C | entomogamy              | capsule       | anemochory   | Yellow               |
| <i>Hypochaeris achyrophorus</i> L.                                                | annual                      | rosulate     | T | entomogamy              | achenes       | anemochory   | yellow               |
| <i>Iberis sempervirens</i> L.                                                     | perennial                   | caespitose   | C | entomogamy              | silique       | anemochory   | white                |
| <i>Juniperus communis</i> subsp. <i>nana</i> (Willd.) Syme                        | perennial                   | caespitose   | P | anemogamy               | berry         | endozoochory |                      |

|                                                                          |             |              |     |                     |            |              |                                    |
|--------------------------------------------------------------------------|-------------|--------------|-----|---------------------|------------|--------------|------------------------------------|
|                                                                          | Short-lived |              |     |                     |            |              |                                    |
| <i>Kernera saxatilis</i> (L.) Sweet                                      | perennial.  | rosulate     | H   | entomogamy          | siliqua    | anemochory   | white                              |
| <i>Lactuca intricata</i> Boiss.                                          | perennial   | caespitose   | H   | entomogamy          | achene     | epizoochory  | lavender-blue,<br>lilac or white   |
| <i>Leontodon crispus</i> Vill.                                           | perennial   | scapose      | H   | entomogamy          | achene     | anemochory   | yellow                             |
| <i>Leontodon hispidus</i> L.                                             | perennial   | scapose      | H   | entomogamy/autogamy | achene     | anemochory   | yellow                             |
| <i>Linaria peloponnesiaca</i> Boiss. & Heldr.                            | perennial   | scapose      | H   | entomogamy          | capsule    | anemochory   | pale yellow                        |
| <i>Linum arboreum</i> L.                                                 | perennial   | suffruticose | C   | entomogamy          | capsule    | barochory    | yellow                             |
| <i>Linum caespitosum</i> Sm.                                             | perennial   | suffruticose | C   | Entomogamy          | capsule    | barochory    | yellow<br>pink with<br>yellow base |
| <i>Malcolmia graeca</i> Boiss. & Spruner                                 | annual      | scapose      | T   | entomogamy          | siliques   | barochory    | pink or purple                     |
| <i>Malcolmia macrocalyx</i> (Halácsy) Rech. f.                           | annual      | scapose      | T   | entomogamy          | silique    | barochory    | yellow                             |
| <i>Marrubium velutinum</i> Sm.                                           |             | suffruticose | H   | entomogamy          | achene     | epizoochory  | yellow                             |
| <i>Medicago truncatula</i> Gaertn.                                       | annual      |              | T   | entomogamy          | legume     | epizoochory  | yellow                             |
| <i>Melica ciliata</i> L.                                                 | perennial   | caespitose   | H   | anemogamy           | caryopsis  | anemochory   |                                    |
| <i>Melica minuta</i> L.                                                  | perennial   | caespitose   | H   | anemogamy           | caryopsis  | barochory    |                                    |
| <i>Melica rectiflora</i> Boiss. & Heldr.                                 | perennial   | caespitose   | H   | anemogamy           | caryopsis  | anemochory   |                                    |
| <i>Minuartia juniperina</i> (L.) Maire & Petitm.                         | perennial   | caespitose   | H   | entomogamy          | capsule    | barochory    | white                              |
| <i>Minuartia stellata</i> (E.D. Clarke) Maire & Petitm.                  | perennial   | caespitose   | C   | entomogamy          | capsule    | epizoochory  | white                              |
| <i>Morina persica</i> L.                                                 | perennial   | scapose      | H   |                     |            |              |                                    |
| <i>Myosotis alpestris</i> F.W. Schmidt                                   | perennial   | scapose      | H   | entomogamy          | achenes    | epizoochory  | blue                               |
| <i>Nepeta parnassica</i> Boiss.                                          | perennial   |              | H   | entomogamy          | achenes    | barochory    | purple-blue                        |
| <i>Onobrychis sphaciotica</i> Greuter                                    | Perennial   | caespitose   | H   | Entomogamy          | legume     | zoochory     | pinkish-purple                     |
| <i>Origanum onites</i> L.                                                | perennial   | suffruticose | C   | entomogamy          | achenes    | barochory    | white                              |
| <i>Osyris alba</i> L.                                                    | perennial   |              | P   | entomogamy          | drupe      | endozoochory | yellowish                          |
| <i>Parietaria cretica</i> L.                                             | annual      | scapose      | T,H | anemogamy           | achene     | epizoochory  |                                    |
| <i>Peucedanum arenarium</i> subsp. <i>neumayeri</i> (Vis.) Stoj. & Stef. | Perennial   | Scapose      | H   | Entomogamy          | schizocarp | anemochory   | white to coral-pink                |
| <i>Phleum alpinum</i> L.                                                 | perennial   | caespitose   | H   | anemogamy           | caryopsis  | epizoochory  |                                    |
| <i>Poa cenisia</i> All.                                                  | perennial   | caespitose   | G   | anemogamy           | caryopsis  | barochory    | green                              |
| <i>Poa thessala</i> Boiss. & Orph.                                       | perennial   | caespitose   | H   | anemogamy           | caryopsis  | barochory    | green                              |
| <i>Polygonum icaricum</i> Rech. f.                                       | Perennial   | suffruticose | C   | Autogamy            | achenes    | barochory    | pink or white                      |
| <i>Polypodium vulgare</i> L.                                             | Perennial   | Rosulate     | G   | Hydrogamy           | Spores     | autochory    |                                    |
| <i>Polystichum lonchitis</i> (L.) Roth                                   | perennial   | caespitose   | H   | Hydrogamy           | spores     | autochory    |                                    |

|                                                                              |           |                    |   |            |                                        |                        |                              |
|------------------------------------------------------------------------------|-----------|--------------------|---|------------|----------------------------------------|------------------------|------------------------------|
|                                                                              |           |                    |   |            |                                        |                        | white or suffused with       |
| <i>Potentilla deorum</i> Boiss. & Heldr.                                     | Perennial | caespitose         | H | Entomogamy | achenes                                | barochory              | pink                         |
| <i>Potentilla haynaldiana</i> Janka                                          | Perennial | caespitose         | H | Entomogamy | achenes                                | barochory              | white                        |
| <i>Potentilla kionaea</i> Halácsy                                            | Perennial | caespitose         | H | Entomogamy | achene                                 | barochory              | purple                       |
| <i>Potentilla speciosa</i> Willd.                                            | perennial | caespitose         | H | entomogamy | achenes                                | barochory              | yellow                       |
| <i>Prangos ferulacea</i> (L.) Lindl.                                         | perennial |                    | H | Entomogamy | schizocarp                             | barochory              | yellow                       |
| <i>Prunus prostrata</i> Labill.                                              | perennial | suffruticose       | P | entomogamy | drupe                                  | endozoochory           | pink                         |
| <i>Ptilostemon afer</i> (Jacq.) Greuter                                      | biennial  |                    | H | entomogamy | achene                                 | barochory              | pink                         |
|                                                                              |           |                    |   |            |                                        | anemochory/epizoochory |                              |
| <i>Ranunculus brevifolius</i> Ten.                                           | perennial | suffruticose       | G | entomogamy | achene                                 | y                      | yellow                       |
| <i>Ranunculus incomparabilis</i> Janka                                       | Perennial | caespitose         | H | Entomogamy | achenes                                | barochory              | yellow                       |
| <i>Ranunculus subhomophyllus</i> (Halácsy) Vierh.                            | Perennial | caespitose         | H | Entomogamy | achene                                 | barochory              | Yellow                       |
|                                                                              |           |                    |   |            | fruit with (2-)3(-4) dehiscent pyrenes |                        |                              |
| <i>Rhamnus alpina</i> L.                                                     | Perennial | suffruticose       | P | anemogamy  | pyrenes                                | endozoochory           |                              |
| <i>Rhamnus saxatilis</i> Jacq.                                               | perennial | suffruticose       | P | anemogamy  | drupe                                  | endozoochory           | yellow                       |
| <i>Rosa heckeliana</i> Tratt.                                                | perennial | suffruticose       | C | entomogamy | achene                                 |                        | pink                         |
|                                                                              |           |                    |   |            | achene/berry-like structure            | endozoochory           | deep purplish-pink           |
| <i>Rosa pendulina</i> L.                                                     | Perennial | fruticose          | P | Entomogamy |                                        |                        |                              |
| <i>Rosa pulverulenta</i> M. Bieb.                                            | perennial | suffruticose       | P | entomogamy | achene                                 |                        | pink or white                |
| <i>Rumex scutatus</i> L.                                                     | perennial | suffruticose       | C | anemogamy  | achene                                 | anemochory             | white-green                  |
| <i>Saxifraga adscendens</i> L.                                               | Biennial  | caespitose         | H | Entomogamy | capsule                                | barochory              | white                        |
| <i>Saxifraga adscendens</i> L. subsp. <i>adscendens</i>                      | Biennial  | caespitose         | H | Entomogamy | capsule                                | barochory              | white                        |
| <i>Saxifraga adscendens</i> subsp. <i>parnassica</i> (Boiss. & Heldr.) Hayek | Biennial  | caespitose         | H | Entomogamy | capsule                                | barochory              | white                        |
|                                                                              |           |                    |   |            |                                        |                        | greenish-yellow              |
| <i>Saxifraga corymbosa</i> Boiss.                                            | Perennial | caespitose         | H | Entomogamy | capsule                                | barochory              | and yellow                   |
|                                                                              |           |                    |   |            |                                        |                        | yellowish-green              |
| <i>Saxifraga exarata</i> Vill.                                               | perennial | caespitose         | H | Entomogamy | capsule                                | barochory              | to pure white                |
|                                                                              |           |                    |   |            |                                        |                        | white or pale                |
| <i>Saxifraga marginata</i> Sternb.                                           | Perennial | caespitose         | H | Entomogamy | capsule                                | barochory              | pink                         |
| <i>Saxifraga oppositifolia</i> L.                                            | Perennial | caespitose         | C | Entomogamy | capsule                                | zoochory               | reddish-purple               |
|                                                                              |           |                    |   |            |                                        |                        | white or pale                |
|                                                                              |           |                    |   |            |                                        |                        | cream, with or without small |
| <i>Saxifraga paniculata</i> Mill.                                            | perennial | densely caespitose | H | entomogamy | capsule                                | barochory              | reddish dots.                |
| <i>Saxifraga pedemontana</i> subsp. <i>cymosa</i> Engl.                      | Perennial | caespitose         | C | Entomogamy | capsule                                | barochory              | white                        |
|                                                                              |           |                    |   |            |                                        |                        | white with                   |
| <i>Saxifraga rotundifolia</i> L.                                             | Perennial | scapose            | H | entomogamy | capsule                                | barochory              | reddish-purple               |

|                                                                                      |                              |              |   |            |            |            |                                                                                                                                 |
|--------------------------------------------------------------------------------------|------------------------------|--------------|---|------------|------------|------------|---------------------------------------------------------------------------------------------------------------------------------|
|                                                                                      |                              |              |   |            |            |            | and sometimes<br>yellow dots<br>above<br>Petals with<br>faint yellowish<br>and purple<br>dots, or<br>sometimes<br>lacking dots. |
| <i>Saxifraga rotundifolia</i> subsp. <i>chrysospleniifolia</i><br>(Boiss.) D.A. Webb | Biennial                     | scapose      | H | entomogamy | capsule    | barochory  |                                                                                                                                 |
| <i>Saxifraga sancta</i> Griseb.                                                      | Perennial                    | caespitose   | C | Entomogamy | capsule    |            | yellow<br>white or<br>sometimes<br>tinged with<br>pink, often<br>aging to a deep<br>cerise-pink.                                |
|                                                                                      | evergreen<br>perennial       | rosulate     | C | Entomogamy | capsule    | barochory  |                                                                                                                                 |
| <i>Saxifraga scardica</i> Griseb.                                                    |                              |              |   |            |            |            |                                                                                                                                 |
| <i>Saxifraga sempervivum</i> K. Koch                                                 | perennial                    | rosulate     | C | Entomogamy | capsule    | barochory  | reddish-purple                                                                                                                  |
| <i>Saxifraga sibirica</i> L.                                                         | Perennial                    | caespitose   | H | Entomogamy | capsule    | barochory  | white                                                                                                                           |
|                                                                                      | Annual to<br>short-<br>lived |              |   |            |            |            |                                                                                                                                 |
| <i>Saxifraga sibthorpii</i> Boiss.                                                   | perennial                    | caespitose   | H | Entomogamy | capsule    | barochory  | bright yellow                                                                                                                   |
| <i>Saxifraga spruneri</i> Boiss.                                                     | Perennial                    | caespitose   | C | Entomogamy | capsule    | barochory  | white                                                                                                                           |
| <i>Saxifraga strobilifera</i> (Velen.) Podp.                                         | Perennial                    | rosulate     | H | Entomogamy | capsule    |            | purplish-pink<br>white spotted<br>with red<br>towards their<br>bases.                                                           |
|                                                                                      |                              |              |   |            |            |            |                                                                                                                                 |
| <i>Saxifraga taygetea</i> Boiss. & Heldr.                                            | Perennial                    | caespitose   | H | Entomogamy | capsule    | barochory  |                                                                                                                                 |
| <i>Saxifraga tridactylites</i> L.                                                    | Annual                       | ccapose      | T | entomogamy | capsule    | anemochory |                                                                                                                                 |
| <i>Scaligeria napiformis</i> (Spreng.) Grande                                        | biennial                     | scapose      | H |            | schizocarp |            | white                                                                                                                           |
|                                                                                      |                              |              |   |            |            |            |                                                                                                                                 |
| <i>Scrophularia canina</i> L.                                                        | perennial                    | suffruticose | H | Entomogamy | capsule    | barochory  | dark purplish-<br>red                                                                                                           |
|                                                                                      |                              |              |   |            |            |            |                                                                                                                                 |
| <i>Scrophularia heterophylla</i> Willd.                                              | perennial                    | suffruticose | H | Entomogamy | capsule    | barochory  | reddish-purple<br>to greenish                                                                                                   |
| <i>Scrophularia lucida</i> L.                                                        | biennial                     | suffruticose | H | Entomogamy | capsule    | barochory  | greenish-brown                                                                                                                  |
| <i>Scrophularia myriophylla</i> Boiss. & Heldr.                                      | biennial                     | scapose      | H | entomogamy | capsule    | barochory  | greenish-brown                                                                                                                  |
| <i>Scutellaria albida</i> L.                                                         | perennial                    | scapose      | H | Entomogamy | achene     | barochory  | white                                                                                                                           |
| <i>Scutellaria rupestris</i> Boiss. & Heldr.                                         | perennial                    |              | H | Entomogamy | achene     | barochory  |                                                                                                                                 |
| <i>Scutellaria sporadum</i> Bothmer                                                  | perennial                    |              | H | Entomogamy | achene     | barochory  |                                                                                                                                 |

|                                                                |                                                                 |              |     |                         |                 |            |                                                                                            |
|----------------------------------------------------------------|-----------------------------------------------------------------|--------------|-----|-------------------------|-----------------|------------|--------------------------------------------------------------------------------------------|
| <i>Sedum album</i> L.                                          | perennial                                                       | succulente   | C   | entomogamy,<br>autogamy | follicles       | anemochory | white or pink                                                                              |
| <i>Sedum annuum</i> L.                                         | Annual or<br>biennial<br>Annual or<br>Biennial<br>sometime<br>s | succulente   | T H | Entomogamy              | follicles       | anemochory | yellow                                                                                     |
| <i>Sedum cepaea</i> L.                                         | perennial                                                       | succulente   | T   | entomogamy              | follicles       | anemochory | white                                                                                      |
| <i>Sedum creticum</i> C. Presl                                 | Annual or<br>biennial                                           | succulente   | T C | Entomogamy,<br>autogamy | follicles       | Anemochory | greenish-white<br>white or pale<br>pink                                                    |
| <i>Sedum dasyphyllum</i> L.                                    | Perennial                                                       | succulente   | H   | Entomogamy              | follicles       | anemochory | pink                                                                                       |
| <i>Sedum eriocarpum</i> Sm. subsp. <i>eriocarpum</i>           | Annual<br>Annual<br>sometime<br>s biennial<br>or                | succulente   | H   | Entomogamy              | follicles       | anemochory | white                                                                                      |
| <i>Sedum hispanicum</i> L.                                     | perennial                                                       | succulente   | H C | entomogamy              | follicles       | anemochory | white                                                                                      |
| <i>Sedum laconicum</i> Boiss. & Heldr.                         | Perennial                                                       | succulente   | H C | Entomogamy              | follicles       | anemochory | yellow                                                                                     |
| <i>Sedum laconicum</i> Boiss. & Heldr. subsp. <i>laconicum</i> | Perennial                                                       | succulente   | H   | Entomogamy              | follicles       | anemochory | yellow                                                                                     |
| <i>Sedum litoreum</i> Guss.                                    | annual                                                          | succulente   | T   | entomogamy              | follicles       | anemochory | yellow                                                                                     |
| <i>Sedum magellense</i> Ten.                                   | perennial                                                       | succulente   | C   | entomogamy              | follicles       | anemochory | whitish                                                                                    |
| <i>Sedum ochroleucum</i> Chaix                                 | Perennial                                                       | succulente   | H   | Entomogamy              | follicles       | anemochory | yellow                                                                                     |
| <i>Sedum rubens</i> L.                                         | annual                                                          | succulente   | T   | Entomogamy              | follicles       | anemochory | white or pink                                                                              |
| <i>Sedum stefco</i> Stef.                                      | Perennial                                                       | succulente   | H   | Entomogamy,<br>autogamy | follicles       | anemochory | white or pink                                                                              |
| <i>Sedum tristriatum</i> Boiss. & Heldr.                       | Perennial                                                       | succulente   | C   | autogamy<br>entomogamy, | follicles erect | anemochory | white                                                                                      |
| <i>Sedum tuberiferum</i> Stoj. & Stef.                         | Perennial                                                       | succulente   | G   | autogamy                | follicles       | anemochory | yellow                                                                                     |
| <i>Sedum urovillei</i> DC.                                     | perennial                                                       | succulente   | H   | Entomogamy              | follicles       | anemochory | yellow                                                                                     |
| <i>Sempervivum ciliosum</i> Craib                              | perennial                                                       | succulente   | C   | Entomogamy              | follicles       | barochory  | yellow                                                                                     |
| <i>Sempervivum marmoreum</i> Griseb.                           | Perennial                                                       | succulente   | C   | Entomogamy              | follicles       | barochory  | red with white<br>margins<br>bright yellow to<br>greenish<br>yellow, purple<br>at the base |
| <i>Sempervivum ruthenicum</i> Schnittsp. & C.B. Lehm.          | Perennial                                                       | succulente   | C   | Entomogamy              | follicles       | barochory  |                                                                                            |
| <i>Senecio fruticosus</i> Sm.                                  | perennial                                                       | suffruticose | H   | entomogamy/autogam<br>y | achenes         | anemochory | yellow                                                                                     |

|                                                                             |           |                       |     |                     |            |             |                                                                                                  |
|-----------------------------------------------------------------------------|-----------|-----------------------|-----|---------------------|------------|-------------|--------------------------------------------------------------------------------------------------|
| <i>Senecio thapsoides</i> DC.                                               | perennial | suffruticose          | H   | entomogamy/autogamy | achenes    | anemochory  | yellow<br>white to<br>pinkish                                                                    |
| <i>Seseli aroanicum</i> Hartvig                                             | perennial | Scapose               | H   | Entomogamy          | schizocarp | barochory   | white                                                                                            |
| <i>Seseli parnassicum</i> Boiss. & Heldr.                                   | perennial | caespitose            | H   | entomogamy          | schizocarp | barochory   |                                                                                                  |
| <i>Sesleria coerulans</i> Friv.                                             | perennial | caespitose            | H   | anemogamy           | caryopsis  | barochory   |                                                                                                  |
| <i>Sesleria tenerrima</i> (Fritsch) Hayek                                   | perennial | caespitose            | H   | anemogamy           | caryopsis  | barochory   |                                                                                                  |
| <i>Sesleria vaginalis</i> Boiss. & Orph.                                    | perennial | caespitose            | H   | anemogamy           | caryopsis  | barochory   |                                                                                                  |
| <i>Sideritis clandestina</i> (Bory & Chaub.) Hayek                          | perennial | caespitose            | H   | entomogamy          | achene     | epizoochory | yellow                                                                                           |
| <i>Sideritis raeseri</i> Boiss. & Heldr.                                    | perennial | caespitose            | H   | entomogamy          | achene     | epizoochory | yellow                                                                                           |
| <i>Silene auriculata</i> Sm.                                                | Perennial | caespitose            | H   | Entomogamy          | capsule    | anemochory  | white or cream<br>white or pale<br>pink above,<br>pinkish-purple<br>beneath                      |
| <i>Silene barbeyana</i> Boiss.                                              | Perennial | densely<br>caespitose | T   | Entomogamy          | capsule    | anemochory  |                                                                                                  |
| <i>Silene caesia</i> Sm.                                                    | perennial | suffruticose          | H   | anemogamy           | capsule    | anemochory  | white or pink<br>white or<br>pinkish                                                             |
| <i>Silene dirphyia</i> Greuter & Burdet                                     | Perennial | caespitose            | H   | Entomogamy          | capsule    | anemochory  |                                                                                                  |
| <i>Silene fabarioides</i> Hausskn.                                          | biennial  | scapose               | H   | entomogamy          | capsule    | anemochory  | white                                                                                            |
| <i>Silene flavescens</i> subsp. <i>thessalonica</i> (Boiss. & Heldr.) Nyman | Perennial | caespitose            | C   | Entomogamy          | capsule    | anemochory  | yellow                                                                                           |
| <i>Silene haussknechtii</i> Hausskn.                                        | annual    | scapose               | T   | entomogamy          | capsule    | anemochory  | pink                                                                                             |
| <i>Silene integripetala</i> Bory & Chaub. subsp. <i>integripetala</i>       | Annual    | scapose               | T   | Entomogamy          | capsule    | anemochory  | bright pink<br>whitish above,<br>greenish to<br>reddish-brown<br>beneath;                        |
| <i>Silene multicaulis</i> Guss.                                             | perennial | Densely<br>Caespitose | H   | Entomogamy          | capsule    | anemochory  | whitish above,<br>greenish or<br>reddish-brown<br>beneath<br>white above,<br>purplish<br>beneath |
| <i>Silene multicaulis</i> Guss. subsp. <i>multicaulis</i>                   | perennial | Densely<br>caespitose | H   | Entomogamy          | capsule    | anemochory  |                                                                                                  |
| <i>Silene orphanidis</i> Boiss.                                             | Perennial | Caespitose            | H   | Entomogamy          | capsule    | anemochory  |                                                                                                  |
| <i>Silene parnassica</i> Boiss. & Spruner                                   | perennial | Densely<br>Caespitose | H   | entomogamy          | capsule    | anemochory  | white                                                                                            |
| <i>Silene taygetea</i> Vierh.                                               | Perennial | Caespitose            | H   | Entomogamy          | capsule    | anemochory  |                                                                                                  |
| <i>Silene vulgaris</i> (Moench) Garcke                                      | Perennial | Caespitose            | H C | entomogamy          | capsule    | anemochory  | whitish                                                                                          |

|                                             |                          |                       |     |                                       |            |              |                                                   |
|---------------------------------------------|--------------------------|-----------------------|-----|---------------------------------------|------------|--------------|---------------------------------------------------|
| <i>Silene waldsteinii</i> Griseb.           | perennial                | Densely<br>Caespitose | H C | Entomogamy                            | capsule    | anemochory   | white                                             |
| <i>Sorbus aria</i> (L.) Crantz              | Perennial                | Suffruticose          | P   | Entomogamy                            | pome       | endozoochory | white                                             |
| <i>Sorbus umbellata</i> (Desf.) Fritsch     | Perennial                | Fruticose             | P   | Entomogamy                            | Pomes      | endozoochory | white                                             |
| <i>Thamnosciadium junceum</i> (Sm.) Hartvig | perennial                | caespitose            | G   | entomogamy                            | schizocarp | barochory    | white                                             |
| <i>Theligonum cynocrambe</i> L.             | annual                   | scapose               | T   | entomogamy                            | achene     | barochory    | green                                             |
| <i>Thymus boissieri</i> Halácsy             | perennial                | caespitose            | C   | entomogamy                            | achene     | epizoozhory  | pink                                              |
| <i>Thymus praecox</i> Opiz                  | perennial                | caespitose            | C   | entomogamy                            | achene     | epizoozhory  | whitish to rose-<br>purple                        |
| <i>Thymus hartvigii</i> R. Morales          | perennial                | caespitose            | C   | entomogamy                            | achene     | epizoozhory  | pink                                              |
| <i>Thymus teucrioides</i> Boiss. & Spruner  | perennial                | caespitose            | C   | entomogamy                            | achene     | epizoozhory  | purple                                            |
| <i>Trinia glauca</i> (L.) Dumort.           | perennial                |                       | H   | entomogamy                            | schizocarp | barochory    | whitish<br>yellowish-<br>white to<br>pinkish      |
| <i>Valantia aprica</i> (Sm.) Tausch         | perennial                | caespitose            | H   | entomogamy                            | capsule    | epizoochory  | pinkish                                           |
| <i>Valantia hispida</i> L.                  | annual                   | scapose               | T   | entomogamy                            | capsule    | epizoozhory  | white                                             |
| <i>Valantia muralis</i> L.                  | annual<br>Biennial<br>or | scapose               | T   | entomogamy                            | capsule    | epizoozhory  | yellowish green                                   |
| <i>Verbascum longifolium</i> Ten.           | perennial                |                       | H   | entomogamy                            | capsule    | epizoozhory  | yellow                                            |
| <i>Verbascum spinosum</i> L.                | perennial                | caespitose            | C   | entomogamy<br>entomogamy/autogam<br>y | capsule    | epizoozhory  | yellow                                            |
| <i>Veronica cymbalaria</i> Bodard           | annual                   | scapose               | T   |                                       | capsule    | epizoozhory  | white                                             |
| <i>Viola albanica</i> Halácsy               | perennial                | caespitose            | H   | entomogamy                            | capsule    | myrmecochory | violet                                            |
| <i>Viola athis</i> W. Becker                | Perennial                | Caespitose            | H   | Entomogamy                            | capsule    | myrmecochory | violet<br>light bluish-<br>violet -pale<br>violet |
| <i>Viola cephalonica</i> Bornm.             | Perennial                | Caespitose            | H   | Entomogamy                            | capsule    | myrmecochory | Pale violet                                       |
| <i>Viola chelmea</i> Boiss. & Heldr.        | Perennial                | Caespitose            | H   | Entomogamy                            | capsule    | myrmecochory | reddish-lilac or<br>pinkish                       |
| <i>Viola delphinantha</i> Boiss.            | Perennial                | Caespitose            | C   | Entomogamy                            | capsule    | myrmecochory | pale violet                                       |
| <i>Viola heldreichiana</i> Boiss.           | Annual                   | Scapose               | T   | Entomogamy                            | capsule    | myrmecochory | yellow                                            |
| <i>Viola mercurii</i> Halácsy               | annual                   | Caespitose            | T   | Entomogamy                            | capsule    | myrmecochory | yellow or violet<br>with a yellow<br>centre       |
| <i>Viola perinensis</i> W. Becker           | Perennial                | Caespitose            | H   | Entomogamy                            | capsule    | myrmecochory |                                                   |
| <i>Viola poetica</i> Boiss. & Spruner       | Perennial                | Caespitose            | H   | Entomogamy                            | capsule    | myrmecochory |                                                   |
| <i>Viola pyrenaica</i> DC.                  | perennial                | Rosulate              | H   | Entomogamy                            | capsule    | myrmecochory | dark violet                                       |
